# Supplementary material
Source: PubMed Central journal article supplement (PMC6582268)
Supplement: jama-321-2306-s001.pdf [file jama-321-2306-s001.pdf]

## Data Supplement Supplementary Online Content

Huded CP, Tuzcu EM, Krishnaswamy A, et al. Association between transcatheter aortic valve replacement and early postprocedural stroke. *JAMA*. doi:10.1001/jama.2019.7525

**eFigure 1.** Study Population

**eFigure 2.** TAVR Access Type by Year

**eFigure 3.** 30-Day Neurologic Events Stratified by Access Type

**eFigure 4.** 30-Day Stroke by Year Stratified by Access Type

**eTable 1.** TVT Registry Neurologic Endpoint Definitions

**eTable 2.** Variable List for Analysis Purpose

**eTable 3.** 30-Day Stroke Rates in Key Subgroups

**eTable 4.** 30-Day Neurologic Event Rates by Year by Year

**eTable 5.** 30-Day Stroke Rates by Year Stratified by Access Type

**eTable 6.** Adjudication of Neurologic Events and Relation to Health Status

**eTable 7.** Characteristics of Propensity Score Matched Patients on Dual Antiplatelet Therapy (Femoral Cohort)

**eTable 8.** Characteristics of Propensity Score Matched Patients on Oral Anticoagulant Therapy (Femoral Cohort)

**eTable 9.** Characteristics of Propensity Score Matched Patients on Dual Antiplatelet Therapy vs. Oral Anticoagulant Therapy (Femoral Cohort)

**eTable 10.** Characteristics of Propensity Score Matched Patients on Dual Antiplatelet Therapy (Non-femoral Cohort)

**eTable 11.** Characteristics of Propensity Score Matched Patients on Oral Anticoagulant Therapy (Non-femoral Cohort)

**eTable 12.** Characteristics of Propensity Score Matched Patients on Dual Antiplatelet Therapy vs. Oral Anticoagulant Therapy (Non-femoral Cohort)

**eTable 13.** Propensity Matched Neurologic Outcomes (Femoral Cohort)

**eTable 14.** Propensity Matched Neurologic Outcomes (Non-femoral Cohort)

This supplementary material has been provided by the authors to give readers additional information about their work.

**eFigure 1. Study Population**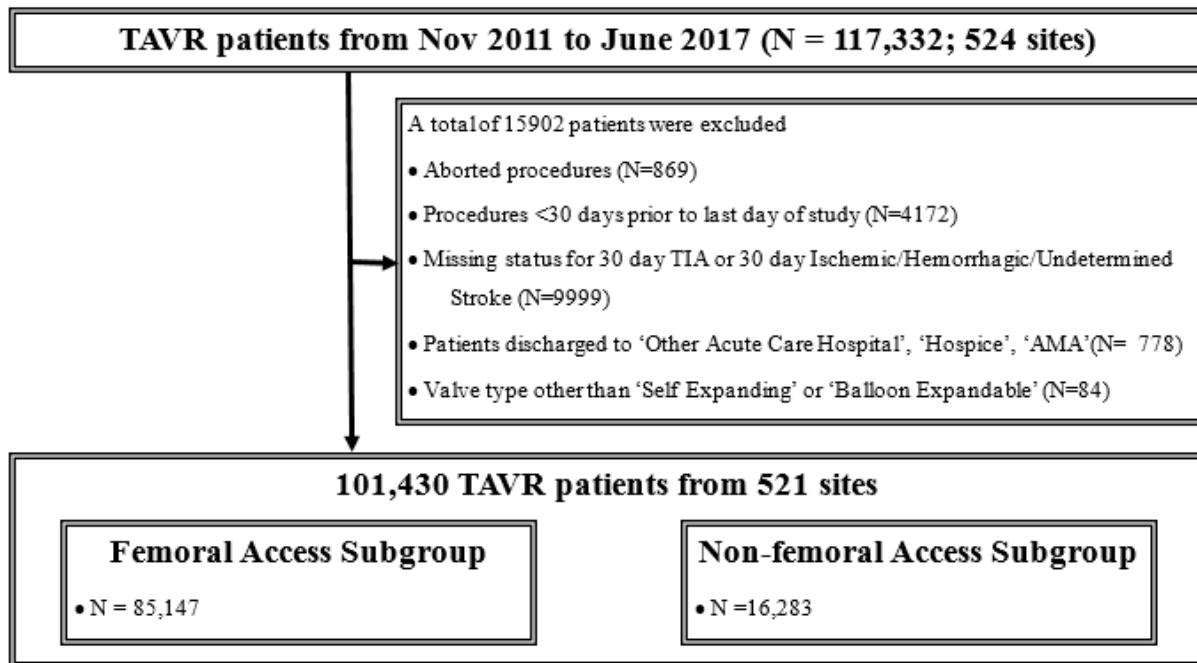

Inclusion and exclusion criteria for the study are shown. Non-femoral access included trans-aortic, left ventricular apical, axillary, subclavian, iliac, transeptal, and carotid TAVR procedures. AMA = against medical advice. TAVR = transcatheter aortic valve replacement. TIA = transient ischemic attack.

**eFigure 2. TAVR Access Type by Year**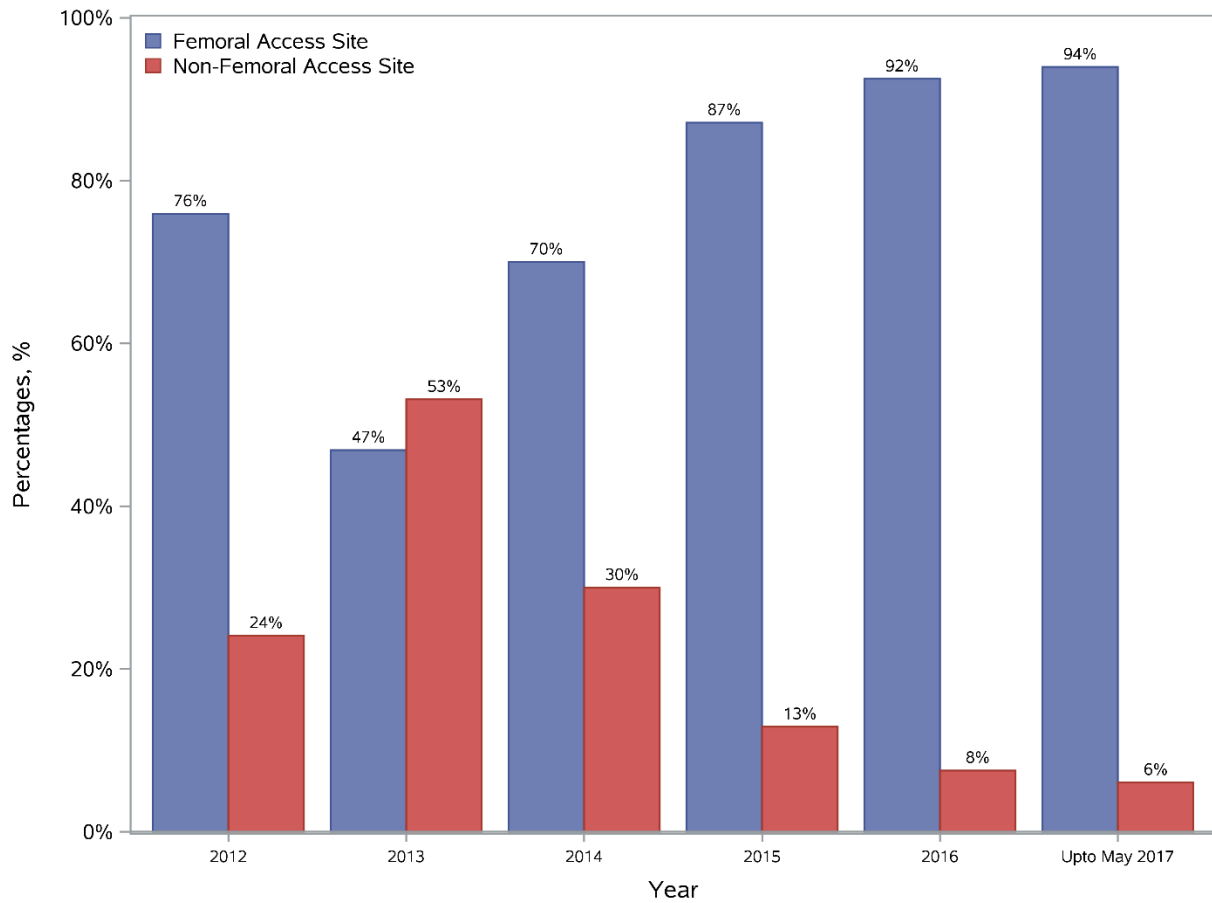

During the study period, the proportion of cases performed with femoral access increased, and femoral TAVR constituted >90% of the study population in 2016-2017. TAVR = transcatheter aortic valve replacement.

**eFigure 3A and 3B. 30-Day Neurologic Events Stratified by Access Type**

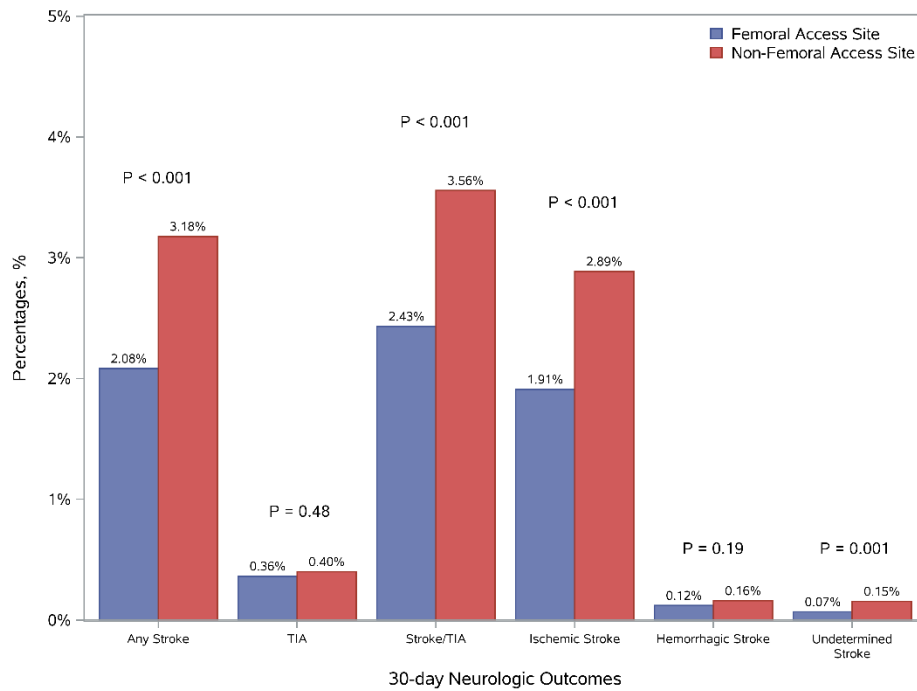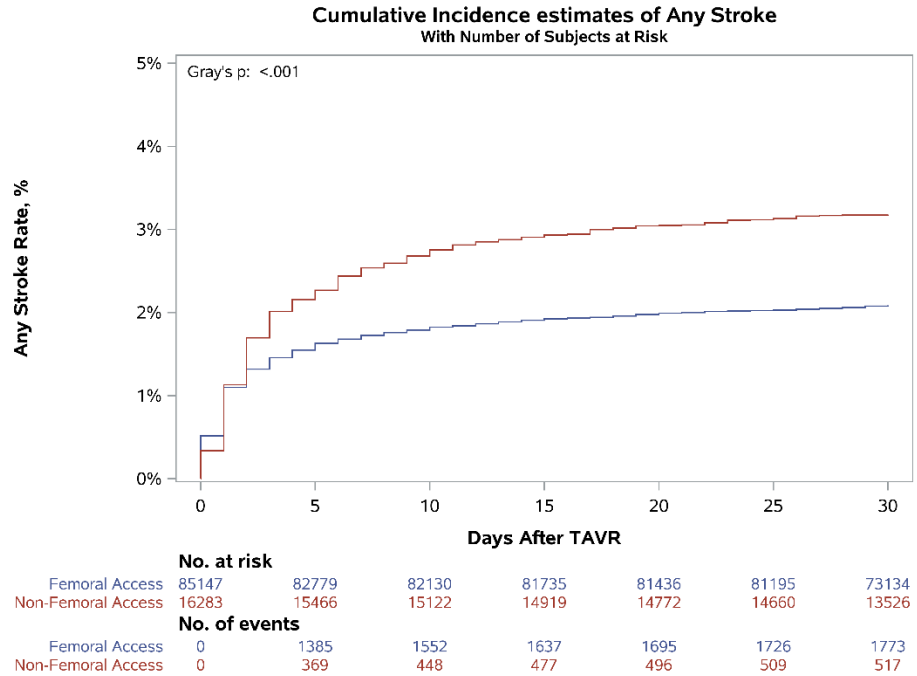

(A) Crude neurologic event rates and (B) cumulative incidence of any stroke within 30-day s of TAVR stratified by access type are shown. TAVR = transcatheter aortic valve replacement. TIA = transient ischemic attack.

**eFigure 4. 30-Day Stroke by Year Stratified by Access Type**

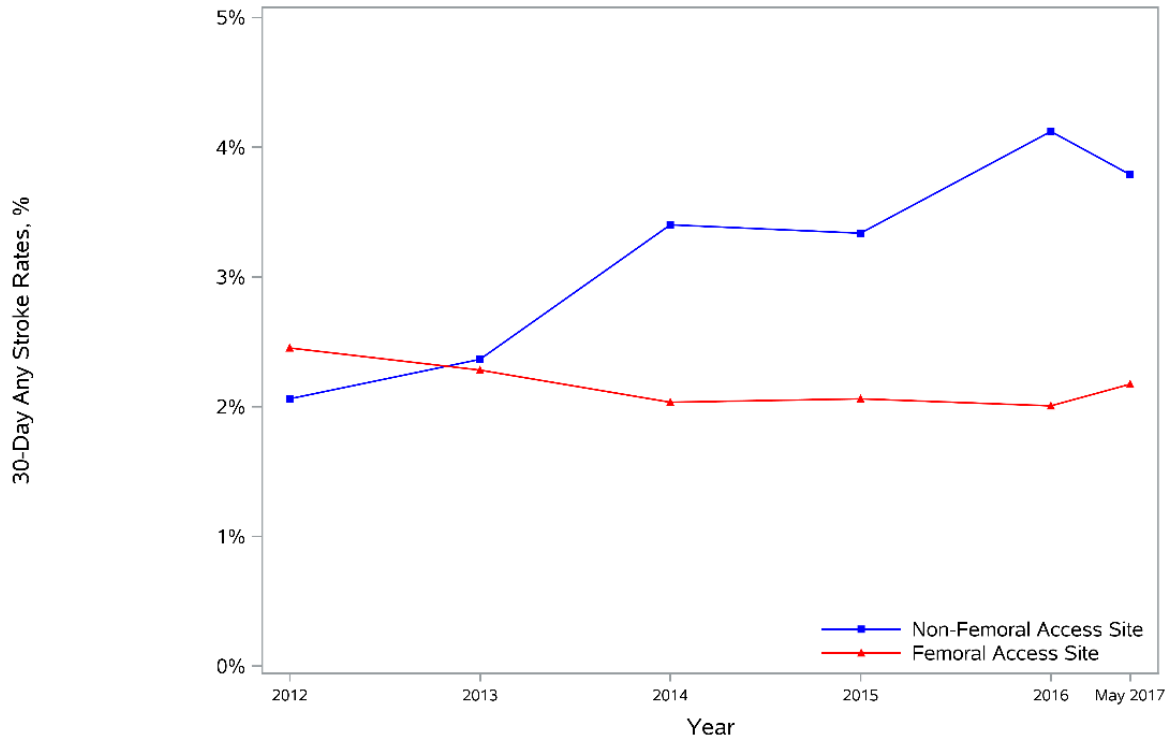

|                         | Cohort Size (N) |      |       |       |       |       |
|-------------------------|-----------------|------|-------|-------|-------|-------|
| All patients            | 4030            | 8042 | 14895 | 23019 | 33958 | 17486 |
|                         | Frequency (n)   |      |       |       |       |       |
| Non-Femoral Access Site | 971             | 4272 | 4469  | 2967  | 2548  | 1056  |
| Femoral Access Site     | 3059            | 3770 | 10426 | 20052 | 31410 | 16430 |

The annual rate of 30-day stroke in femoral and non-femoral access TAVR is shown.

**eTable 1. TVT Registry Neurologic Endpoint Definitions**

| <b>Endpoint</b>             | <b>Definition</b>                                                                                                                                                                                                                                                                                                                                                                                                                                                                                                                                                                                                                                                                                                                                                                    |
|-----------------------------|--------------------------------------------------------------------------------------------------------------------------------------------------------------------------------------------------------------------------------------------------------------------------------------------------------------------------------------------------------------------------------------------------------------------------------------------------------------------------------------------------------------------------------------------------------------------------------------------------------------------------------------------------------------------------------------------------------------------------------------------------------------------------------------|
| Stroke                      | <p>A stroke is defined as an acute episode of a focal or global neurological deficit lasting <math>\geq 24</math> hours (without another readily identifiable non-stroke cause for the clinical presentation) with at least one of the following:</p> <ol style="list-style-type: none"> <li>change in level of consciousness, hemiplegia, hemiparesis, numbness, or sensory loss affecting one side of the body,</li> <li>dysphagia or aphagia, hemianopsia, amaurosis fugax</li> <li>other neurological signs or symptoms consistent with stroke</li> </ol> <p>OR <math>&lt; 24</math> h (with at least one of A-C above) if available neuroimaging documents a new hemorrhage or infarct</p> <p>OR the neurological deficit results in death (with at least one of A-C above)</p> |
| Ischemic stroke subtype     | An acute episode of focal cerebral, spinal, or retinal dysfunction caused by infarction of the central nervous system tissue. This is usually due to thrombus or embolus (and not primarily due to hemorrhage). Hemorrhagic transformation may be a consequence of ischemic stroke. In this situation, the stroke should be recorded as an ischemic stroke with hemorrhagic transformation rather than a hemorrhagic event                                                                                                                                                                                                                                                                                                                                                           |
| Hemorrhagic stroke subtype  | An acute episode of focal or global cerebral or spinal dysfunction caused by intraparenchymal, intraventricular, or subarachnoid hemorrhage. Evidence should include either imaging (CT, MRI), lumbar puncture, neurosurgery, or autopsy.                                                                                                                                                                                                                                                                                                                                                                                                                                                                                                                                            |
| Undetermined stroke subtype | A stroke may be classified as undetermined if there is insufficient information to allow categorization as ischemic or hemorrhagic.                                                                                                                                                                                                                                                                                                                                                                                                                                                                                                                                                                                                                                                  |
| Transient ischemic attack   | Duration of a focal or global neurological deficit $< 24$ h (see 1.A – 1.C above), any variable neuroimaging not demonstrating new hemorrhage or infarct.                                                                                                                                                                                                                                                                                                                                                                                                                                                                                                                                                                                                                            |

**eTable 2. Variable List for Analysis Purpose**

| Variable                  | Level                   | Overall<br>(N=101430) |       | 30 day Stroke =<br>No<br>(N=99140) |       | 30 day Stroke = Yes<br>(N=2290) |       | P-value+ |
|---------------------------|-------------------------|-----------------------|-------|------------------------------------|-------|---------------------------------|-------|----------|
| <b>Access Site</b>        |                         |                       |       |                                    |       |                                 |       |          |
| TVT Access Site           | Femoral                 | 85147                 | 83.9  | 83374                              | 84.1  | 1773                            | 77.4  | <.001    |
|                           | Transapical/Transaortic | 12949                 | 12.8  | 12568                              | 12.7  | 381                             | 16.6  |          |
|                           | Other                   | 3334                  | 3.3   | 3198                               | 3.2   | 136                             | 5.9   |          |
| <b>A. Model Variables</b> |                         |                       |       |                                    |       |                                 |       |          |
| Age*                      | Median                  | 101430                | 83.0  | 99140                              | 82.0  | 2290                            | 84.0  | <.001    |
|                           | 25th                    |                       | 76.0  |                                    | 76.0  |                                 | 78.0  |          |
|                           | 75th                    |                       | 87.0  |                                    | 87.0  |                                 | 88.0  |          |
|                           | Min                     |                       | 0.0   |                                    | 0.0   |                                 | 29.0  |          |
|                           | Max                     |                       | 116.0 |                                    | 116.0 |                                 | 100.0 |          |
|                           | Missing(%)              |                       | 0.0   |                                    | 0.0   |                                 | 0.0   |          |
| Body Surface Area*        | Median                  | 101324                | 1.9   | 99036                              | 1.9   | 2288                            | 1.8   | <.001    |
|                           | 25th                    |                       | 1.7   |                                    | 1.7   |                                 | 1.6   |          |
|                           | 75th                    |                       | 2.0   |                                    | 2.0   |                                 | 2.0   |          |
|                           | Min                     |                       | 0.6   |                                    | 0.6   |                                 | 0.8   |          |
|                           | Max                     |                       | 4.1   |                                    | 4.1   |                                 | 3.0   |          |
|                           | Missing(%)              |                       | 0.1   |                                    | 0.1   |                                 | 0.1   |          |
| Gender                    | Missing                 | 13                    | 0.0   | 13                                 | 0.0   | 0                               | 0.0   | <.001    |
|                           | Male                    | 53620                 | 52.9  | 52581                              | 53.0  | 1039                            | 45.4  |          |
|                           | Female                  | 47797                 | 47.1  | 46546                              | 46.9  | 1251                            | 54.6  |          |
| Race White                | No                      | 6315                  | 6.2   | 6152                               | 6.2   | 163                             | 7.1   | 0.074    |
|                           | Yes                     | 95115                 | 93.8  | 92988                              | 93.8  | 2127                            | 92.9  |          |
| LVEF*                     | Median                  | 100440                | 58.0  | 98162                              | 58.0  | 2278                            | 59.0  | 0.001    |
|                           | 25th                    |                       | 48.0  |                                    | 48.0  |                                 | 50.0  |          |
|                           | 75th                    |                       | 64.0  |                                    | 64.0  |                                 | 65.0  |          |

|                                |             |        |        |       |        |      |        |       |
|--------------------------------|-------------|--------|--------|-------|--------|------|--------|-------|
|                                | Min         |        | 3.0    |       | 3.0    |      | 10.0   |       |
|                                | Max         |        | 99.0   |       | 99.0   |      | 90.0   |       |
|                                | Missing(%)  |        | 1.0    |       | 1.0    |      | 0.5    |       |
|                                |             |        |        |       |        |      |        |       |
| Hemoglobin<br>(g/dL)*          | Median      | 101149 | 11.9   | 98863 | 11.9   | 2286 | 11.9   | 0.386 |
|                                | 25th        |        | 10.6   |       | 10.6   |      | 10.6   |       |
|                                | 75th        |        | 13.2   |       | 13.2   |      | 13.1   |       |
|                                | Min         |        | 0.1    |       | 0.1    |      | 5.4    |       |
|                                | Max         |        | 48.2   |       | 48.2   |      | 37.3   |       |
|                                | Missing(%)  |        | 0.3    |       | 0.3    |      | 0.2    |       |
|                                |             |        |        |       |        |      |        |       |
| Platelet<br>Count ( $\mu$ L)*  | Median      | 100828 | 193000 | 98549 | 193000 | 2279 | 200000 | <.001 |
|                                | 25th        |        | 154000 |       | 154000 |      | 159000 |       |
|                                | 75th        |        | 239000 |       | 239000 |      | 247000 |       |
|                                | Min         |        | 1000.0 |       | 1000.0 |      | 1430.0 |       |
|                                | Max         |        | 900000 |       | 900000 |      | 828000 |       |
|                                | Missing(%)  |        | 0.6    |       | 0.6    |      | 0.5    |       |
|                                |             |        |        |       |        |      |        |       |
| GFR                            | Missing     | 259    | 0.3    | 252   | 0.3    | 7    | 0.3    | <.001 |
|                                | GFR >60     | 52176  | 51.4   | 51087 | 51.5   | 1089 | 47.6   |       |
|                                | GFR 30 - 60 | 39888  | 39.3   | 38934 | 39.3   | 954  | 41.7   |       |
|                                | GFR < 30    | 5058   | 5.0    | 4901  | 4.9    | 157  | 6.9    |       |
|                                | On Dialysis | 4049   | 4.0    | 3966  | 4.0    | 83   | 3.6    |       |
|                                |             |        |        |       |        |      |        |       |
| Left Main<br>Stenosis<br>>=50% | Missing     | 997    | 1.0    | 977   | 1.0    | 20   | 0.9    | 0.988 |
|                                | No          | 90557  | 89.3   | 88510 | 89.3   | 2047 | 89.4   |       |
|                                | Yes         | 9876   | 9.7    | 9653  | 9.7    | 223  | 9.7    |       |
|                                |             |        |        |       |        |      |        |       |
| Proximal<br>LAD >=70%          | Missing     | 1069   | 1.1    | 1048  | 1.1    | 21   | 0.9    | 0.830 |
|                                | No          | 81252  | 80.1   | 79419 | 80.1   | 1833 | 80.0   |       |
|                                | Yes         | 19109  | 18.8   | 18673 | 18.8   | 436  | 19.0   |       |
|                                |             |        |        |       |        |      |        |       |
| Prior MI                       | Missing     | 214    | 0.2    | 211   | 0.2    | 3    | 0.1    | 0.561 |
|                                | No          | 76819  | 75.7   | 75095 | 75.7   | 1724 | 75.3   |       |
|                                | Yes         | 24397  | 24.1   | 23834 | 24.0   | 563  | 24.6   |       |
|                                |             |        |        |       |        |      |        |       |
| Endocarditis                   | Missing     | 144    | 0.1    | 142   | 0.1    | 2    | 0.1    | 0.040 |
|                                | No          | 100341 | 98.9   | 98065 | 98.9   | 2276 | 99.4   |       |



|                              |                |       |      |       |      |      |      |       |
|------------------------------|----------------|-------|------|-------|------|------|------|-------|
|                              | Yes            | 945   | 0.9  | 933   | 0.9  | 12   | 0.5  |       |
| Prior Stroke/TIA             | Missing        | 241   | 0.2  | 240   | 0.2  | 1    | 0.0  | <.001 |
|                              | No             | 82404 | 81.2 | 80722 | 81.4 | 1682 | 73.4 |       |
|                              | Yes            | 18785 | 18.5 | 18178 | 18.3 | 607  | 26.5 |       |
| Carotid Stenosis             | Missing        | 1276  | 1.3  | 1255  | 1.3  | 21   | 0.9  | <.001 |
|                              | None           | 62434 | 61.6 | 61089 | 61.6 | 1345 | 58.7 |       |
|                              | Right          | 6262  | 6.2  | 6095  | 6.1  | 167  | 7.3  |       |
|                              | Left           | 5863  | 5.8  | 5698  | 5.7  | 165  | 7.2  |       |
|                              | Both           | 8348  | 8.2  | 8127  | 8.2  | 221  | 9.7  |       |
|                              | Not assessed   | 17247 | 17.0 | 16876 | 17.0 | 371  | 16.2 |       |
| Peripheral Arterial Disease  | Missing        | 96    | 0.1  | 95    | 0.1  | 1    | 0.0  | <.001 |
|                              | No             | 71246 | 70.2 | 69748 | 70.4 | 1498 | 65.4 |       |
|                              | Yes            | 30088 | 29.7 | 29297 | 29.6 | 791  | 34.5 |       |
| Current/Recent Smoker        | Missing        | 88    | 0.1  | 86    | 0.1  | 2    | 0.1  | 0.192 |
|                              | No             | 95638 | 94.3 | 93493 | 94.3 | 2145 | 93.7 |       |
|                              | Yes            | 5704  | 5.6  | 5561  | 5.6  | 143  | 6.2  |       |
| Diabetes Mellitus            | Missing        | 104   | 0.1  | 104   | 0.1  | 0    | 0.0  | 0.670 |
|                              | No             | 63219 | 62.3 | 61800 | 62.3 | 1419 | 62.0 |       |
|                              | Yes            | 38107 | 37.6 | 37236 | 37.6 | 871  | 38.0 |       |
| NYHA Class w/in 2 Weeks      | Missing        | 771   | 0.8  | 751   | 0.8  | 20   | 0.9  | 0.078 |
|                              | Class I/II/III | 83506 | 82.3 | 81654 | 82.4 | 1852 | 80.9 |       |
|                              | Class IV       | 17153 | 16.9 | 16735 | 16.9 | 418  | 18.3 |       |
| Atrial Fibrillation /Flutter | Missing        | 145   | 0.1  | 142   | 0.1  | 3    | 0.1  | 0.493 |
|                              | No             | 60889 | 60.0 | 59530 | 60.0 | 1359 | 59.3 |       |
|                              | Yes            | 40396 | 39.8 | 39468 | 39.8 | 928  | 40.5 |       |
| Conduction Defect            | Missing        | 488   | 0.5  | 478   | 0.5  | 10   | 0.4  | 0.148 |
|                              | No             | 64558 | 63.6 | 63067 | 63.6 | 1491 | 65.1 |       |
|                              | Yes            | 36384 | 35.9 | 35595 | 35.9 | 789  | 34.5 |       |
| Chronic Lung                 | Missing        | 565   | 0.6  | 556   | 0.6  | 9    | 0.4  | 0.245 |

|                                |                          |       |      |       |      |      |      |       |
|--------------------------------|--------------------------|-------|------|-------|------|------|------|-------|
| Disease                        | None/Mild/Moderate       | 88073 | 86.8 | 86063 | 86.8 | 2010 | 87.8 |       |
|                                | Severe                   | 12792 | 12.6 | 12521 | 12.6 | 271  | 11.8 |       |
| Home Oxygen                    | Missing                  | 147   | 0.1  | 145   | 0.1  | 2    | 0.1  | 0.565 |
|                                | No                       | 90329 | 89.1 | 88280 | 89.0 | 2049 | 89.5 |       |
|                                | Yes                      | 10954 | 10.8 | 10715 | 10.8 | 239  | 10.4 |       |
| Hostile Chest                  | Missing                  | 146   | 0.1  | 144   | 0.1  | 2    | 0.1  | 0.181 |
|                                | No                       | 93360 | 92.0 | 91234 | 92.0 | 2126 | 92.8 |       |
|                                | Yes                      | 7924  | 7.8  | 7762  | 7.8  | 162  | 7.1  |       |
| Porcelain Aorta                | Missing                  | 185   | 0.2  | 180   | 0.2  | 5    | 0.2  | 0.008 |
|                                | No                       | 96206 | 94.8 | 94062 | 94.9 | 2144 | 93.6 |       |
|                                | Yes                      | 5039  | 5.0  | 4898  | 4.9  | 141  | 6.2  |       |
| Valve Type                     | Missing                  | 114   | 0.1  | 111   | 0.1  | 3    | 0.1  | <.001 |
|                                | Self Expanding Valve     | 26249 | 25.9 | 25494 | 25.7 | 755  | 33.0 |       |
|                                | Balloon Expandable Valve | 75067 | 74.0 | 73535 | 74.2 | 1532 | 66.9 |       |
| Prior CIED                     | Missing                  | 65    | 0.1  | 65    | 0.1  | 0    | 0.0  | <.001 |
|                                | No                       | 86107 | 84.9 | 84086 | 84.8 | 2021 | 88.3 |       |
|                                | Yes                      | 15258 | 15.0 | 14989 | 15.1 | 269  | 11.7 |       |
| Prior PCI                      | Missing                  | 158   | 0.2  | 154   | 0.2  | 4    | 0.2  | 0.669 |
|                                | No                       | 66247 | 65.3 | 64742 | 65.3 | 1505 | 65.7 |       |
|                                | Yes                      | 35025 | 34.5 | 34244 | 34.5 | 781  | 34.1 |       |
| Prior Aortic/Cardiac procedure | Missing                  | 1263  | 1.2  | 1237  | 1.2  | 26   | 1.1  | <.001 |
|                                | No                       | 67794 | 66.8 | 66150 | 66.7 | 1644 | 71.8 |       |
|                                | Yes                      | 32373 | 31.9 | 31753 | 32.0 | 620  | 27.1 |       |
| AV Disease Etiology            | Missing                  | 211   | 0.2  | 208   | 0.2  | 3    | 0.1  | 0.522 |
|                                | Other                    | 5322  | 5.2  | 5195  | 5.2  | 127  | 5.5  |       |
|                                | Degenerative             | 95897 | 94.5 | 93737 | 94.6 | 2160 | 94.3 |       |
| Valve Morphology               | Missing                  | 601   | 0.6  | 587   | 0.6  | 14   | 0.6  | 0.518 |
|                                | Other                    | 10423 | 10.3 | 10197 | 10.3 | 226  | 9.9  |       |
|                                | Tricuspid                | 90406 | 89.1 | 88356 | 89.1 | 2050 | 89.5 |       |

|                                 |                                           |       |      |       |      |      |      |       |
|---------------------------------|-------------------------------------------|-------|------|-------|------|------|------|-------|
| Aortic Insufficiency            | Missing                                   | 693   | 0.7  | 681   | 0.7  | 12   | 0.5  | 0.388 |
|                                 | None/Trace/Trivial/Mild                   | 80872 | 79.7 | 79027 | 79.7 | 1845 | 80.6 |       |
|                                 | Moderate/Severe                           | 19865 | 19.6 | 19432 | 19.6 | 433  | 18.9 |       |
| Mitral Insufficiency            | Missing                                   | 481   | 0.5  | 475   | 0.5  | 6    | 0.3  | 0.955 |
|                                 | None/Trace/Trivial/Mild                   | 73317 | 72.3 | 71657 | 72.3 | 1660 | 72.5 |       |
|                                 | Moderate/Severe                           | 27632 | 27.2 | 27008 | 27.2 | 624  | 27.2 |       |
| Tricuspid Insufficiency         | Missing                                   | 790   | 0.8  | 773   | 0.8  | 17   | 0.7  | 0.006 |
|                                 | None/Trace/Trivial/Mild                   | 77475 | 76.4 | 75671 | 76.3 | 1804 | 78.8 |       |
|                                 | Moderate/Severe                           | 23165 | 22.8 | 22696 | 22.9 | 469  | 20.5 |       |
| Acuity                          | Elective                                  | 90059 | 88.8 | 88066 | 88.8 | 1993 | 87.0 | 0.057 |
|                                 | Urgent                                    | 7774  | 7.7  | 7573  | 7.6  | 201  | 8.8  |       |
|                                 | CardioShock/Inotropes/<br>MechanicalAssit | 3142  | 3.1  | 3057  | 3.1  | 85   | 3.7  |       |
|                                 | Emergency/Salvage/Car<br>diacArrest       | 455   | 0.4  | 444   | 0.4  | 11   | 0.5  |       |
| Heart Failure<br>w/in 2 Weeks   | Missing                                   | 157   | 0.2  | 153   | 0.2  | 4    | 0.2  | 0.131 |
|                                 | No                                        | 22445 | 22.1 | 21968 | 22.2 | 477  | 20.8 |       |
|                                 | Yes                                       | 78828 | 77.7 | 77019 | 77.7 | 1809 | 79.0 |       |
| Hypertension                    | Missing                                   | 65    | 0.1  | 65    | 0.1  | 0    | 0.0  | 0.016 |
|                                 | No                                        | 10052 | 9.9  | 9859  | 9.9  | 193  | 8.4  |       |
|                                 | Yes                                       | 91313 | 90.0 | 89216 | 90.0 | 2097 | 91.6 |       |
| Vascular<br>Disease             | Missing                                   | 146   | 0.1  | 144   | 0.1  | 2    | 0.1  | <.001 |
|                                 | No                                        | 41229 | 40.6 | 40397 | 40.7 | 832  | 36.3 |       |
|                                 | Yes                                       | 60055 | 59.2 | 58599 | 59.1 | 1456 | 63.6 |       |
| Anticoagulant<br>Therapy        | Missing                                   | 4896  | 4.8  | 4807  | 4.8  | 89   | 3.9  | 0.329 |
|                                 | No                                        | 66793 | 65.9 | 65291 | 65.9 | 1502 | 65.6 |       |
|                                 | Yes                                       | 29741 | 29.3 | 29042 | 29.3 | 699  | 30.5 |       |
| Dual<br>Antiplatelet<br>Therapy | Missing                                   | 7     | 0.0  | 7     | 0.0  | 0    | 0.0  | <.001 |
|                                 | No                                        | 42963 | 42.4 | 41752 | 42.1 | 1211 | 52.9 |       |
|                                 | Yes                                       | 58460 | 57.6 | 57381 | 57.9 | 1079 | 47.1 |       |

|                                 |                |       |      |       |      |      |      |       |
|---------------------------------|----------------|-------|------|-------|------|------|------|-------|
| Procedure Year*                 | 2012           | 4030  | 4.0  | 3935  | 4.0  | 95   | 4.1  | 0.228 |
|                                 | 2013           | 8042  | 7.9  | 7855  | 7.9  | 187  | 8.2  |       |
|                                 | 2014           | 14895 | 14.7 | 14531 | 14.7 | 364  | 15.9 |       |
|                                 | 2015           | 23019 | 22.7 | 22507 | 22.7 | 512  | 22.4 |       |
|                                 | 2016           | 33958 | 33.5 | 33223 | 33.5 | 735  | 32.1 |       |
|                                 | Up to May 2017 | 17486 | 17.2 | 17089 | 17.2 | 397  | 17.3 |       |
| In-hospital Atrial Fibrillation | No             | 97546 | 96.2 | 95440 | 96.3 | 2106 | 92.0 | <.001 |
|                                 | Yes            | 3884  | 3.8  | 3700  | 3.7  | 184  | 8.0  |       |
| General Anesthesia              | Missing        | 218   | 0.2  | 215   | 0.2  | 3    | 0.1  | <.001 |
|                                 | No             | 24089 | 23.7 | 23620 | 23.8 | 469  | 20.5 |       |
|                                 | Yes            | 77123 | 76.0 | 75305 | 76.0 | 1818 | 79.4 |       |
| Failed Bioprosthetic Valve      | Missing        | 87    | 0.1  | 85    | 0.1  | 2    | 0.1  | 0.064 |
|                                 | No             | 98486 | 97.1 | 96248 | 97.1 | 2238 | 97.7 |       |
|                                 | Yes            | 2857  | 2.8  | 2807  | 2.8  | 50   | 2.2  |       |

Categorical variables presented as number (frequency) and continuous variables presented as median, 25<sup>th</sup> percentile, 75<sup>th</sup> percentile, minimum, and maximum. +P-values do not correspond to the table exactly as it is presented here. More appropriately, p-values were calculated by comparing only non-missing row values. +P-values are based on Pearson chi-square tests for all categorical row variables. \*P-values are based on chi-square rank based group means score statistics for all continuous/ordinal row variables (designated by \*). \*This is equivalent to Wilcoxon tests. All tests treat the column variable as nominal. AV = aortic valve. CIED = cardiac implantable electrical device. GFR = glomerular filtration rate. LAD = left anterior descending. LVEF = left ventricular ejection fraction. MI = myocardial infarction. NYHA = New York Heart Association. PCI = percutaneous coronary intervention .TIA = transient ischemic attack.

**eTable 3. 30-Day Stroke Rates in Key Subgroups**

| Subgroup                              | Level                                                    | Femoral<br>(N=85147) |                           | P-value | Non-Femoral<br>(N=16,283) |                           | P-value |
|---------------------------------------|----------------------------------------------------------|----------------------|---------------------------|---------|---------------------------|---------------------------|---------|
|                                       |                                                          | Stroke<br>Events (N) | 30-Day Stroke<br>Rate (%) |         | Stroke<br>Events (N)      | 30-Day Stroke<br>Rate (%) |         |
| Valve-in-Valve<br>procedure           | Yes                                                      | 119                  | 2.1%                      | 0.83    | 27                        | 3.1%                      | 0.85    |
|                                       | No                                                       | 1654                 | 2.1%                      |         | 490                       | 3.2%                      |         |
| Valve Morphology                      | Bicuspid                                                 | 54                   | 2.4%                      | 0.21    | 7                         | 1.9%                      | 0.14    |
|                                       | Tricuspid                                                | 1584                 | 2.1%                      |         | 466                       | 3.1%                      |         |
|                                       | Other                                                    | 127                  | 1.9%                      |         | 38                        | 3.9%                      |         |
| Heart Team<br>Reason for<br>Procedure | Inoperable /<br>Extreme Risk                             | 480                  | 2.2%                      | 0.01    | 231                       | 2.9%                      | 0.33    |
|                                       | High Risk (>8%<br>risk of 30-day<br>mortality)           | 1097                 | 2.1%                      |         | 257                       | 2.9%                      |         |
|                                       | Intermediate Risk<br>(4-7% risk of 30-<br>day mortality) | 171                  | 1.6%                      |         | 21                        | 3.1%                      |         |
|                                       | Low risk (<4%<br>risk of 30-day<br>mortality)            | 18                   | 2.0%                      |         | 1                         | 2.5%                      |         |
|                                       | Patient<br>Preference /<br>Other                         | 6                    | 2.4%                      |         | 6                         | 2.4%                      |         |
| Age                                   | >89 years                                                | 295                  | 2.6%                      | <.001   | 71                        | 3.9%                      | 0.06    |
|                                       | 80-89 years                                              | 956                  | 2.2%                      |         | 265                       | 3.3%                      |         |

| <b>Subgroup</b> | <b>Level</b>  | <b>Femoral<br/>(N=85147)</b> |      | <b>P-value</b> | <b>Non-Femoral<br/>(N=16,283)</b> |      | <b>P-value</b> |
|-----------------|---------------|------------------------------|------|----------------|-----------------------------------|------|----------------|
|                 | <80 years     | 522                          | 1.7% |                | 181                               | 2.8% |                |
| Site Volume     | >100 patients | 1637                         | 2.1% | 0.66           | 497                               | 3.2% | 0.51           |
|                 | <100 patients | 136                          | 2.2% |                | 20                                | 3.7% |                |
| Anesthesia Type | General       | 1746                         | 2.1% | 0.05           | 505                               | 3.2% | 0.77           |
|                 | Other         | 458                          | 1.9% |                | 11                                | 3.5% |                |
| Aortic Stenosis | Yes           | 1746                         | 2.1% | 0.84           | 510                               | 3.2% | 0.07           |
|                 | No            | 20                           | 2.2% |                | 6                                 | 6.5% |                |

Variables are categorical and shown as number of strokes (left column) and 30-day stroke rate (% , right column).

**eTable 4. 30-Day Neurologic Event Rates by Year**

| <b>Event</b>        | <b>2012</b> | <b>2013</b> | <b>2014</b> | <b>2015</b> | <b>2016</b> | <b>2017</b> | <b>P-trend</b> |
|---------------------|-------------|-------------|-------------|-------------|-------------|-------------|----------------|
| TIA                 | 0.45%       | 0.39%       | 0.34%       | 0.39%       | 0.32%       | 0.42%       | .90            |
| Ischemic stroke     | 2.06%       | 2.04%       | 2.26%       | 2.12%       | 1.97%       | 2.05%       | .29            |
| Hemorrhagic stroke  | 0.15%       | 0.17%       | 0.13%       | 0.07%       | 0.14%       | 0.15%       | .88            |
| Undetermined stroke | 0.17%       | 0.14%       | 0.07%       | 0.05%       | 0.08%       | 0.09%       | .16            |
| Any stroke          | 2.36%       | 2.33%       | 2.44%       | 2.22%       | 2.16%       | 2.27%       | .22            |

2017 values are through May 31<sup>st</sup>. TIA = transient ischemic attack.

**eTable 5. 30-Day Stroke Rates by Year Stratified by Access Type**

| <b>30-Day Stroke Rates</b> | <b>2012</b> | <b>2013</b> | <b>2014</b> | <b>2015</b> | <b>2016</b> | <b>2017</b> | <b>P-trend</b> |
|----------------------------|-------------|-------------|-------------|-------------|-------------|-------------|----------------|
| Femoral                    | 2.45%       | 2.28%       | 2.03%       | 2.06%       | 2.01%       | 2.17%       | .47            |
| Non-Femoral                | 2.06%       | 2.36%       | 3.40%       | 3.34%       | 4.12%       | 3.79%       | <.001          |

2017 values are through May 31st.



**eTable 6. Adjudication of Neurologic Events and Relation to Health Status**

| Variable                                                             | Level                                  | All Stroke<br>(N=2290) |       | Femoral<br>Stroke<br>(N=1773) |       | Non-femoral<br>Stroke<br>(N=517) |       | P     |
|----------------------------------------------------------------------|----------------------------------------|------------------------|-------|-------------------------------|-------|----------------------------------|-------|-------|
|                                                                      |                                        | N                      | %     | N                             | %     | N                                | %     |       |
| Symptom Duration >= 24 hours                                         |                                        | 1564                   | 82.3% | 1207                          | 81.4% | 357                              | 85.2% | 0.07  |
| Neuroimaging Performed                                               |                                        | 1876                   | 98.7% | 1460                          | 98.5% | 416                              | 99.3% | 0.34  |
| Deficit Type                                                         | No Deficit                             | 209                    | 11.1% | 160                           | 11.0% | 49                               | 11.8% | 0.84  |
|                                                                      | Infarction                             | 1528                   | 81.4% | 1195                          | 81.8% | 333                              | 80.0% |       |
|                                                                      | Hemorrhage                             | 73                     | 3.9%  | 54                            | 3.7%  | 19                               | 4.6%  |       |
|                                                                      | Both<br>(hemorrhage<br>and infarction) | 49                     | 2.6%  | 37                            | 2.5%  | 12                               | 2.9%  |       |
|                                                                      | Subarachnoid<br>Hemorrhage             | 13                     | 0.7%  | 11                            | 0.8%  | 2                                | 0.5%  |       |
| Social/Recreational Activities Impaired                              |                                        | 924                    | 48.6% | 735                           | 49.6% | 189                              | 45.1% | 0.11  |
| Neurocognitive Functions Essential to Patient or Livelihood Impaired |                                        | 655                    | 34.5% | 510                           | 34.4% | 145                              | 34.6% | 0.008 |
| New Aids or Assistance Required                                      |                                        | 784                    | 41.2% | 617                           | 41.6% | 167                              | 39.9% | 0.02  |
| Neurologist/Neurosurgeon Confirmation of Diagnosis                   |                                        | 1783                   | 93.8% | 1394                          | 94.1% | 389                              | 92.8% | 0.26  |
| Death as a Result of Neurologic Deficit                              |                                        | 214                    | 11.3% | 160                           | 10.8% | 54                               | 12.9% | 0.24  |

Variables are categorical and shown as number (left column) and frequency (% , right column). TIA = transient ischemic attack.

**eTable 7. Characteristics of Propensity Score Matched Patients on Dual Antiplatelet Therapy (Femoral Cohort)**

|                                               | <i>Level</i> | <i>Before Matching</i><br><i>N=81872</i> |                                    |                                          | <i>After Matching</i><br><i>N=31192</i> |                                    |                                          |
|-----------------------------------------------|--------------|------------------------------------------|------------------------------------|------------------------------------------|-----------------------------------------|------------------------------------|------------------------------------------|
|                                               |              | <i>DAPT(-)</i><br><i>(N=32751)</i>       | <i>DAPT(+)</i><br><i>(N=49121)</i> | <i>Standardized</i><br><i>Difference</i> | <i>DAPT(-)</i><br><i>(N=15596)</i>      | <i>DAPT(+)</i><br><i>(N=15596)</i> | <i>Standardized</i><br><i>Difference</i> |
| Age (Median, IQR)                             |              | 83.0 ( 77.0,<br>87.0)                    | 82.0 ( 76.0,<br>87.0)              | -0.071                                   | 83.0 ( 76.0,<br>87.0)                   | 83.0 ( 76.0,<br>87.0)              | 0.004                                    |
| BSA (m <sup>2</sup> , Median, IQR)            |              | 1.9 (1.7, 2.1)                           | 1.9 (1.7, 2.0)                     | -0.039                                   | 1.9 (1.7, 2.0)                          | 1.9 (1.7, 2.0)                     | 0.003                                    |
| LVEF (Median, IQR)                            |              | 58.0 ( 47.0,<br>60.0)                    | 58.0 ( 50.0,<br>60.0)              | 0.061                                    | 58.0 ( 50.0,<br>60.0)                   | 58.0 ( 50.0,<br>60.0)              | 0.005                                    |
| Hemoglobin (g/dL, Median, IQR)                |              | 11.9 ( 10.6,<br>13.2)                    | 12.0 ( 10.7,<br>13.2)              | 0.046                                    | 11.8 ( 10.5,<br>13.1)                   | 11.9 ( 10.6,<br>13.1)              | 0.017                                    |
| Platelet Count (per 1000 $\mu$ , Median, IQR) |              | 188.0 (148.0,<br>233.0)                  | 195.0 (158.0,<br>241.0)            | 0.137                                    | 189.0 (146.0,<br>237.0)                 | 188.0 (151.0,<br>232.0)            | 0.022                                    |
| Female, n (%)                                 | Yes          | 15124 (46.2)                             | 22451 (45.7)                       | -0.010                                   | 7168 (46.0)                             | 7158 (45.9)                        | -0.001                                   |
| Race, n (%)                                   | Yes          | 30998 (94.6)                             | 45746 (93.1)                       | -0.063                                   | 14544 (93.3)                            | 14524 (93.1)                       | -0.005                                   |
| GFR, n (%)                                    | On Dialysis  | 1203 ( 3.7)                              | 1910 ( 3.9)                        | 0.055                                    | 692 ( 4.4)                              | 679 ( 4.4)                         | 0.018                                    |
|                                               | ≤30          | 1624 ( 5.0)                              | 2163 ( 4.4)                        | .                                        | 820 ( 5.3)                              | 766 ( 4.9)                         | .                                        |
|                                               | 30-60        | 13134 (40.1)                             | 18682 (38.0)                       | .                                        | 5970 (38.3)                             | 6044 (38.8)                        | .                                        |
|                                               | >60          | 16790 (51.3)                             | 26366 (53.7)                       | .                                        | 8114 (52.0)                             | 8107 (52.0)                        | .                                        |
| Left main stenosis≥50%, n (%)                 | Yes          | 2513 ( 7.7)                              | 4892 (10.0)                        | 0.081                                    | 1267 ( 8.1)                             | 1334 ( 8.6)                        | 0.016                                    |
| Proximal LAD, n (%)                           | Yes          | 4979 (15.2)                              | 9896 (20.1)                        | 0.130                                    | 2529 (16.2)                             | 2600 (16.7)                        | 0.012                                    |
| Prior MI, n (%)                               | Yes          | 6890 (21.0)                              | 11883 (24.2)                       | 0.075                                    | 3335 (21.4)                             | 3507 (22.5)                        | 0.027                                    |
| Endocarditis, n(%)                            | Yes          | 358 ( 1.1)                               | 445 ( 0.9)                         | -0.019                                   | 170 ( 1.1)                              | 156 ( 1.0)                         | -0.009                                   |
| Prior Stroke/TIA                              | Yes          | 6359 (19.4)                              | 8286 (16.9)                        | -0.066                                   | 2789 (17.9)                             | 2735 (17.5)                        | -0.009                                   |
| Carotid Stenosis, n (%)                       | One/Both     | 5317 (16.2)                              | 9636 (19.6)                        | 0.088                                    | 2583 (16.6)                             | 2653 (17.0)                        | 0.012                                    |
| Prior PAD, n (%)                              | Yes          | 7979 (24.4)                              | 12432 (25.3)                       | 0.022                                    | 3757 (24.1)                             | 3765 (24.1)                        | 0.001                                    |

|                                       | Level           | Before Matching<br>N=81872 |                      |                            | After Matching<br>N=31192 |                      |                            |
|---------------------------------------|-----------------|----------------------------|----------------------|----------------------------|---------------------------|----------------------|----------------------------|
|                                       |                 | DAPT(-)<br>(N=32751)       | DAPT(+)<br>(N=49121) | Standardized<br>Difference | DAPT(-)<br>(N=15596)      | DAPT(+)<br>(N=15596) | Standardized<br>Difference |
| Smoking status, n (%)                 | Yes             | 1327 ( 4.1)                | 2461 ( 5.0)          | 0.046                      | 707 ( 4.5)                | 712 ( 4.6)           | 0.002                      |
| Diabetes, n (%)                       | Yes             | 12016 (36.7)               | 18709 (38.1)         | 0.029                      | 5738 (36.8)               | 5806 (37.2)          | 0.009                      |
| NYHA, n (%)                           | Class IV        | 5832 (17.8)                | 7336 (14.9)          | -0.078                     | 2674 (17.1)               | 2688 (17.2)          | 0.002                      |
| Atrial Fibrillation/Flutter, n (%)    | Yes             | 20674 (63.1)               | 11729 (23.9)         | -0.862                     | 6438 (41.3)               | 6296 (40.4)          | -0.019                     |
| Conduction defect, n (%)              | Yes             | 12218 (37.3)               | 17668 (36.0)         | -0.028                     | 5586 (35.8)               | 5568 (35.7)          | -0.002                     |
| Chronic Lung disease, n (%)           | Severe          | 4019 (12.3)                | 5626 (11.5)          | -0.025                     | 1797 (11.5)               | 1775 (11.4)          | -0.004                     |
| Home Oxygen, n (%)                    | Yes             | 3494 (10.7)                | 4679 ( 9.5)          | -0.038                     | 1587 (10.2)               | 1596 (10.2)          | 0.002                      |
| Hostile Chest, n (%)                  | Yes             | 2301 ( 7.0)                | 3875 ( 7.9)          | 0.033                      | 1111 ( 7.1)               | 1115 ( 7.1)          | 0.001                      |
| Porcelain Aorta, n (%)                | Yes             | 1206 ( 3.7)                | 1947 ( 4.0)          | 0.015                      | 574 ( 3.7)                | 583 ( 3.7)           | 0.003                      |
| Prior CIED, n (%)                     | Yes             | 7278 (22.2)                | 6958 (14.2)          | -0.210                     | 2713 (17.4)               | 2725 (17.5)          | 0.002                      |
| Prior PCI, n (%)                      | Yes             | 8461 (25.8)                | 19097 (38.9)         | 0.282                      | 4495 (28.8)               | 4699 (30.1)          | 0.029                      |
| Prior Aortic/Cardiac procedure, n (%) | Yes             | 10126 (30.9)               | 14965 (30.5)         | -0.010                     | 4597 (29.5)               | 4628 (29.7)          | 0.004                      |
| Aortic Etiology, n (%)                |                 | 30858 (94.2)               | 46672 (95.0)         | 0.035                      | 14728 (94.4)              | 14733 (94.5)         | 0.001                      |
| Valve Morphology, n (%)               | Tricuspid       | 29139 (89.0)               | 43997 (89.6)         | 0.019                      | 13759 (88.2)              | 13813 (88.6)         | 0.011                      |
| Aortic Insufficiency, n (%)           | Moderate/Severe | 6265 (19.1)                | 9566 (19.5)          | 0.009                      | 3052 (19.6)               | 3103 (19.9)          | 0.008                      |
| Mitral Insufficiency, n (%)           | Moderate/Severe | 9789 (29.9)                | 12141 (24.7)         | -0.116                     | 4166 (26.7)               | 4153 (26.6)          | -0.002                     |
| Tricuspid Insufficiency, n (%)        | Moderate/Severe | 9505 (29.0)                | 9106 (18.5)          | -0.248                     | 3621 (23.2)               | 3513 (22.5)          | -0.017                     |
| Acuity, n (%)                         | Salvage         | 134 ( 0.4)                 | 177 ( 0.4)           | 0.071                      | 75 ( 0.5)                 | 74 ( 0.5)            | 0.005                      |
|                                       | Emergency       | 1099 ( 3.4)                | 1216 ( 2.5)          | .                          | 459 ( 2.9)                | 462 ( 3.0)           | .                          |

|                                        |                          | <i>Before Matching</i><br><i>N=81872</i> |                                    |                                          | <i>After Matching</i><br><i>N=31192</i> |                                    |                                          |
|----------------------------------------|--------------------------|------------------------------------------|------------------------------------|------------------------------------------|-----------------------------------------|------------------------------------|------------------------------------------|
|                                        | <i>Level</i>             | <i>DAPT(-)</i><br><i>(N=32751)</i>       | <i>DAPT(+)</i><br><i>(N=49121)</i> | <i>Standardized</i><br><i>Difference</i> | <i>DAPT(-)</i><br><i>(N=15596)</i>      | <i>DAPT(+)</i><br><i>(N=15596)</i> | <i>Standardized</i><br><i>Difference</i> |
|                                        | Urgent                   | 2632 ( 8.0)                              | 3376 ( 6.9)                        | .                                        | 1236 ( 7.9)                             | 1216 ( 7.8)                        | .                                        |
|                                        | Elective                 | 28886 (88.2)                             | 44352 (90.3)                       | .                                        | 13826 (88.7)                            | 13844 (88.8)                       | .                                        |
| Heart Failure w/in 2 weeks, n (%)      | Yes                      | 26055 (79.6)                             | 37514 (76.4)                       | -0.077                                   | 12127 (77.8)                            | 12131 (77.8)                       | 0.001                                    |
| Hypertension, n (%)                    | Yes                      | 29317 (89.5)                             | 44150 (89.9)                       | 0.012                                    | 13869 (88.9)                            | 13903 (89.1)                       | 0.007                                    |
| Vascular Disease, n (%)                | Yes                      | 17306 (52.8)                             | 28442 (57.9)                       | 0.102                                    | 8288 (53.1)                             | 8447 (54.2)                        | 0.020                                    |
| TAVR year, n (%)                       | Upto May 2017            | 6268 (19.1)                              | 9633 (19.6)                        | 0.052                                    | 2767 (17.7)                             | 2866 (18.4)                        | 0.028                                    |
|                                        | 2016                     | 11779 (36.0)                             | 18585 (37.8)                       | .                                        | 5434 (34.8)                             | 5538 (35.5)                        | .                                        |
|                                        | 2015                     | 7877 (24.1)                              | 11361 (23.1)                       | .                                        | 3865 (24.8)                             | 3734 (23.9)                        | .                                        |
|                                        | 2014                     | 4092 (12.5)                              | 5851 (11.9)                        | .                                        | 2030 (13.0)                             | 2017 (12.9)                        | .                                        |
|                                        | 2013                     | 1491 ( 4.6)                              | 2092 ( 4.3)                        | .                                        | 813 ( 5.2)                              | 788 ( 5.1)                         | .                                        |
|                                        | 2012                     | 1244 ( 3.8)                              | 1599 ( 3.3)                        | .                                        | 687 ( 4.4)                              | 653 ( 4.2)                         | .                                        |
| In-hospital Atrial Fibrillation, n (%) | Yes                      | 920 ( 2.8)                               | 985 ( 2.0)                         | -0.053                                   | 393 ( 2.5)                              | 392 ( 2.5)                         | -0.000                                   |
| General Anesthesia, n (%)              | Yes                      | 24068 (73.5)                             | 34662 (70.6)                       | -0.065                                   | 11775 (75.5)                            | 11621 (74.5)                       | -0.023                                   |
| Failed Bioprosthetic Valve, n (%)      | Yes                      | 1059 ( 3.2)                              | 1429 ( 2.9)                        | -0.019                                   | 454 ( 2.9)                              | 456 ( 2.9)                         | 0.001                                    |
| Valve Type, n (%)                      | Balloon Expandable Valve | 23761 (72.6)                             | 35254 (71.8)                       | -0.017                                   | 11500 (73.7)                            | 11462 (73.5)                       | -0.006                                   |
| Anticoagulant Therapy, n (%)           | Yes                      | 20890 (63.8)                             | 3718 ( 7.6)                        | -1.449                                   | 3737 (24.0)                             | 3717 (23.8)                        | -0.003                                   |

BSA = body surface area. CIED = cardiac implantable electrical device. DAPT = dual antiplatelet therapy. GFR = glomerular filtration rate. LAD = left anterior descending artery. LVEF = left ventricular ejection fraction. MI = myocardial infarction. NYHA = New York Heart Association. PAD = peripheral arterial disease. PCI = percutaneous coronary intervention. TAVR = transcatheter aortic valve replacement. TIA = transient ischemic attack.

**eTable 8. Characteristics of Propensity Score Matched Patients on Oral Anticoagulant Therapy (Femoral Cohort)**

|                                                  | Level       | Before Matching<br>N=81872 |                         |                            | After Matching<br>N=22022 |                         |                            |
|--------------------------------------------------|-------------|----------------------------|-------------------------|----------------------------|---------------------------|-------------------------|----------------------------|
|                                                  |             | OAC(-)<br>(N=57264)        | OAC(+)<br>(N=24608)     | Standardized<br>Difference | OAC(-)<br>(N=11011)       | OAC(+)<br>(N=11011)     | Standardized<br>Difference |
| Age (Median, IQR)                                |             | 82.0 ( 76.0,<br>87.0)      | 83.0 ( 77.0,<br>87.0)   | 0.085                      | 83.0 ( 76.0,<br>87.0)     | 83.0 ( 77.0,<br>87.0)   | -0.007                     |
| BSA (m <sup>2</sup> , Median, IQR)               |             | 1.9 (1.7, 2.0)             | 1.9 (1.7, 2.1)          | 0.157                      | 1.9 (1.7, 2.1)            | 1.9 (1.7, 2.1)          | 0.015                      |
| LVEF (Median, IQR)                               |             | 59.0 ( 50.0,<br>60.0)      | 56.0 ( 45.0,<br>60.0)   | -0.154                     | 58.0 ( 45.0,<br>60.0)     | 57.0 ( 45.0,<br>60.0)   | -0.007                     |
| Hemoglobin (g/dL, Median,<br>IQR)                |             | 12.0 ( 10.7,<br>13.2)      | 12.0 ( 10.8,<br>13.2)   | 0.036                      | 11.9 ( 10.6,<br>13.2)     | 11.9 ( 10.6,<br>13.1)   | 0.012                      |
| Platelet Count (per 1000 $\mu$ ,<br>Median, IQR) |             | 193.0 (155.0,<br>240.0)    | 189.0 (152.0,<br>233.0) | -0.061                     | 191.0 (148.0,<br>239.0)   | 190.0 (153.0,<br>235.0) | 0.007                      |
| Female, n (%)                                    | Yes         | 26636 (46.5)               | 10939 (44.5)            | -0.041                     | 4877 (44.3)               | 4874 (44.3)             | -0.001                     |
| Race, n (%)                                      | Yes         | 53090 (92.7)               | 23654 (96.1)            | 0.149                      | 10473 (95.1)              | 10468 (95.1)            | -0.002                     |
| GFR, n (%)                                       | On Dialysis | 2358 ( 4.1)                | 755 ( 3.1)              | 0.093                      | 448 ( 4.1)                | 412 ( 3.7)              | 0.019                      |
|                                                  | ≤30         | 2652 ( 4.6)                | 1135 ( 4.6)             | .                          | 535 ( 4.9)                | 558 ( 5.1)              | .                          |
|                                                  | 30-60       | 21575 (37.7)               | 10241 (41.6)            | .                          | 4442 (40.3)               | 4428 (40.2)             | .                          |
|                                                  | >60         | 30679 (53.6)               | 12477 (50.7)            | .                          | 5586 (50.7)               | 5613 (51.0)             | .                          |
| Left main stenosis≥50%, n (%)                    | Yes         | 5396 ( 9.4)                | 2009 ( 8.2)             | -0.045                     | 975 ( 8.9)                | 964 ( 8.8)              | -0.004                     |
| Proximal LAD, n (%)                              | Yes         | 10720 (18.7)               | 4155 (16.9)             | -0.048                     | 2072 (18.8)               | 2023 (18.4)             | -0.011                     |
| Prior MI, n (%)                                  | Yes         | 13218 (23.1)               | 5555 (22.6)             | -0.012                     | 2573 (23.4)               | 2560 (23.2)             | -0.003                     |
| Endocarditis, n(%)                               | Yes         | 537 ( 0.9)                 | 266 ( 1.1)              | 0.014                      | 117 ( 1.1)                | 130 ( 1.2)              | 0.011                      |
| Prior Stroke/TIA                                 | Yes         | 9504 (16.6)                | 5141 (20.9)             | 0.110                      | 2171 (19.7)               | 2176 (19.8)             | 0.001                      |
| Carotid Stenosis, n (%)                          | One/Both    | 10757 (18.8)               | 4196 (17.1)             | -0.045                     | 1930 (17.5)               | 1938 (17.6)             | 0.002                      |
| Prior PAD, n (%)                                 | Yes         | 14149 (24.7)               | 6262 (25.4)             | 0.017                      | 2782 (25.3)               | 2856 (25.9)             | 0.015                      |

|                                       | <i>Level</i>    | <i>Before Matching<br/>N=81872</i> |                             |                                    | <i>After Matching<br/>N=22022</i> |                             |                                    |
|---------------------------------------|-----------------|------------------------------------|-----------------------------|------------------------------------|-----------------------------------|-----------------------------|------------------------------------|
|                                       |                 | <i>OAC(-)<br/>(N=57264)</i>        | <i>OAC(+)<br/>(N=24608)</i> | <i>Standardized<br/>Difference</i> | <i>OAC(-)<br/>(N=11011)</i>       | <i>OAC(+)<br/>(N=11011)</i> | <i>Standardized<br/>Difference</i> |
| Smoking status, n (%)                 | Yes             | 2870 ( 5.0)                        | 918 ( 3.7)                  | -0.063                             | 466 ( 4.2)                        | 467 ( 4.2)                  | 0.001                              |
| Diabetes, n (%)                       | Yes             | 21511 (37.6)                       | 9214 (37.4)                 | -0.003                             | 4142 (37.6)                       | 4147 (37.7)                 | 0.001                              |
| NYHA, n (%)                           | Class IV        | 8704 (15.2)                        | 4464 (18.1)                 | 0.079                              | 1959 (17.8)                       | 2026 (18.4)                 | 0.016                              |
| Atrial Fibrillation/Flutter, n (%)    | Yes             | 12375 (21.6)                       | 20028 (81.4)                | 1.492                              | 6601 (59.9)                       | 6587 (59.8)                 | -0.003                             |
| Conduction defect, n (%)              | Yes             | 20462 (35.7)                       | 9424 (38.3)                 | 0.053                              | 4116 (37.4)                       | 4105 (37.3)                 | -0.002                             |
| Chronic Lung disease, n (%)           | Severe          | 6488 (11.3)                        | 3157 (12.8)                 | 0.046                              | 1363 (12.4)                       | 1354 (12.3)                 | -0.003                             |
| Home Oxygen, n (%)                    | Yes             | 5453 ( 9.5)                        | 2720 (11.1)                 | 0.050                              | 1226 (11.1)                       | 1244 (11.3)                 | 0.005                              |
| Hostile Chest, n (%)                  | Yes             | 4381 ( 7.7)                        | 1795 ( 7.3)                 | -0.014                             | 802 ( 7.3)                        | 813 ( 7.4)                  | 0.004                              |
| Porcelain Aorta, n (%)                | Yes             | 2218 ( 3.9)                        | 935 ( 3.8)                  | -0.004                             | 395 ( 3.6)                        | 392 ( 3.6)                  | -0.002                             |
| Prior CIED, n (%)                     | Yes             | 7737 (13.5)                        | 6499 (26.4)                 | 0.327                              | 2393 (21.7)                       | 2440 (22.2)                 | 0.010                              |
| Prior PCI, n (%)                      | Yes             | 19950 (34.8)                       | 7608 (30.9)                 | -0.084                             | 3726 (33.8)                       | 3787 (34.4)                 | 0.012                              |
| Prior Aortic/Cardiac procedure, n (%) | Yes             | 16918 (29.5)                       | 8173 (33.2)                 | 0.079                              | 3606 (32.7)                       | 3625 (32.9)                 | 0.004                              |
| Aortic Etiology, n (%)                |                 | 54390 (95.0)                       | 23140 (94.0)                | -0.042                             | 10361 (94.1)                      | 10350 (94.0)                | -0.004                             |
| Valve Morphology, n (%)               | Tricuspid       | 51100 (89.2)                       | 22036 (89.5)                | 0.010                              | 9778 (88.8)                       | 9780 (88.8)                 | 0.001                              |
| Aortic Insufficiency, n (%)           | Moderate/Severe | 11211 (19.6)                       | 4620 (18.8)                 | -0.020                             | 2129 (19.3)                       | 2167 (19.7)                 | 0.009                              |
| Mitral Insufficiency, n (%)           | Moderate/Severe | 14052 (24.5)                       | 7878 (32.0)                 | 0.167                              | 3196 (29.0)                       | 3214 (29.2)                 | 0.004                              |
| Tricuspid Insufficiency, n (%)        | Moderate/Severe | 10380 (18.1)                       | 8231 (33.4)                 | 0.356                              | 2984 (27.1)                       | 3024 (27.5)                 | 0.008                              |
| Acuity, n (%)                         | Salvage         | 233 ( 0.4)                         | 78 ( 0.3)                   | 0.079                              | 46 ( 0.4)                         | 52 ( 0.5)                   | 0.014                              |
|                                       | Emergency       | 1410 ( 2.5)                        | 905 ( 3.7)                  | .                                  | 347 ( 3.2)                        | 352 ( 3.2)                  | .                                  |

|                                        | Level                    | Before Matching<br>N=81872 |                     |                            | After Matching<br>N=22022 |                     |                            |
|----------------------------------------|--------------------------|----------------------------|---------------------|----------------------------|---------------------------|---------------------|----------------------------|
|                                        |                          | OAC(-)<br>(N=57264)        | OAC(+)<br>(N=24608) | Standardized<br>Difference | OAC(-)<br>(N=11011)       | OAC(+)<br>(N=11011) | Standardized<br>Difference |
|                                        | Urgent                   | 4068 ( 7.1)                | 1940 ( 7.9)         | .                          | 903 ( 8.2)                | 870 ( 7.9)          | .                          |
|                                        | Elective                 | 51553 (90.0)               | 21685 (88.1)        | .                          | 9715 (88.2)               | 9737 (88.4)         | .                          |
| Heart Failure w/in 2 weeks, n (%)      | Yes                      | 43879 (76.6)               | 19690 (80.0)        | 0.082                      | 8613 (78.2)               | 8710 (79.1)         | 0.022                      |
| Hypertension, n (%)                    | Yes                      | 51210 (89.4)               | 22257 (90.4)        | 0.034                      | 9895 (89.9)               | 9893 (89.8)         | -0.001                     |
| Vascular Disease, n (%)                | Yes                      | 32177 (56.2)               | 13571 (55.1)        | -0.021                     | 6186 (56.2)               | 6181 (56.1)         | -0.001                     |
| TAVR year, n (%)                       | Upto May 2017            | 10862 (19.0)               | 5039 (20.5)         | 0.053                      | 2077 (18.9)               | 2147 (19.5)         | 0.032                      |
|                                        | 2016                     | 21180 (37.0)               | 9184 (37.3)         | .                          | 4014 (36.5)               | 4074 (37.0)         | .                          |
|                                        | 2015                     | 13489 (23.6)               | 5749 (23.4)         | .                          | 2596 (23.6)               | 2561 (23.3)         | .                          |
|                                        | 2014                     | 7074 (12.4)                | 2869 (11.7)         | .                          | 1337 (12.1)               | 1323 (12.0)         | .                          |
|                                        | 2013                     | 2583 ( 4.5)                | 1000 ( 4.1)         | .                          | 544 ( 4.9)                | 509 ( 4.6)          | .                          |
|                                        | 2012                     | 2076 ( 3.6)                | 767 ( 3.1)          | .                          | 443 ( 4.0)                | 397 ( 3.6)          | .                          |
| In-hospital Atrial Fibrillation, n (%) | Yes                      | 1143 ( 2.0)                | 762 ( 3.1)          | 0.070                      | 443 ( 4.0)                | 458 ( 4.2)          | 0.007                      |
| General Anesthesia, n (%)              | Yes                      | 41149 (71.9)               | 17581 (71.4)        | -0.009                     | 8214 (74.6)               | 8087 (73.4)         | -0.026                     |
| Failed Bioprosthetic Valve, n (%)      | Yes                      | 1661 ( 2.9)                | 827 ( 3.4)          | 0.026                      | 357 ( 3.2)                | 388 ( 3.5)          | 0.016                      |
| Valve Type, n (%)                      | Balloon Expandable Valve | 41523 (72.5)               | 17492 (71.1)        | -0.032                     | 7930 (72.0)               | 7875 (71.5)         | -0.011                     |
| Dual Antiplatelet Therapy, n (%)       | Yes                      | 45403 (79.3)               | 3718 (15.1)         | -1.678                     | 3748 (34.0)               | 3713 (33.7)         | -0.007                     |

BSA = body surface area. CIED = cardiac implantable electrical device. GFR = glomerular filtration rate. LAD = left anterior descending artery. LVEF = left ventricular ejection fraction. MI = myocardial infarction. NYHA = New York Heart Association. OAC = oral anticoagulant. PAD = peripheral arterial disease. PCI = percutaneous coronary intervention. TAVR = transcatheter aortic valve replacement. TIA = transient ischemic attack.

**eTable 9. Characteristics of Propensity Score Matched Patients on Dual Antiplatelet Therapy vs. Oral Anticoagulant Therapy (Femoral Cohort)**

| Level                                      | Before Matching <sup>[A]</sup><br>N=66293 |                         |                            | After Matching<br>N=24668 |                         |                            |        |
|--------------------------------------------|-------------------------------------------|-------------------------|----------------------------|---------------------------|-------------------------|----------------------------|--------|
|                                            | OAC(+)<br>(N=20890)                       | DAPT(+)<br>(N=45403)    | Standardized<br>Difference | OAC(+)<br>(N=12334)       | DAPT(+)<br>(N=12334)    | Standardized<br>Difference |        |
| Age (Median, IQR)                          | 83.0 ( 77.0,<br>87.0)                     | 82.0 ( 76.0,<br>87.0)   | -0.104                     | 83.0 ( 77.0,<br>87.0)     | 83.0 ( 77.0,<br>88.0)   | -0.002                     |        |
| BSA (m <sup>2</sup> , Median, IQR)         | 1.9 (1.7, 2.1)                            | 1.9 (1.7, 2.0)          | -0.125                     | 1.9 (1.7, 2.1)            | 1.9 (1.7, 2.1)          | 0.004                      |        |
| LVEF (Median, IQR)                         | 57.0 ( 45.0,<br>60.0)                     | 58.0 ( 50.0,<br>60.0)   | 0.135                      | 57.0 ( 45.0,<br>60.0)     | 57.0 ( 45.0,<br>60.0)   | -0.007                     |        |
| Hemoglobin (g/dL, Median,<br>IQR)          | 12.0 ( 10.8,<br>13.2)                     | 12.0 ( 10.8,<br>13.2)   | -0.012                     | 11.9 ( 10.6,<br>13.1)     | 11.9 ( 10.6,<br>13.2)   | -0.015                     |        |
| Platelet Count (per 1000μ,<br>Median, IQR) | 189.0 (152.0,<br>232.0)                   | 195.0 (159.0,<br>241.0) | 0.112                      | 193.0 (154.0,<br>237.0)   | 192.0 (154.0,<br>237.0) | 0.006                      |        |
| Female, n (%)                              | Yes                                       | 9507 (45.5)             | 21019 (46.3)               | 0.016                     | 5492 (44.5)             | 5429 (44.0)                | -0.010 |
| Race, n (%)                                | Yes                                       | 20083 (96.1)            | 42175 (92.9)               | -0.143                    | 11736 (95.2)            | 11715 (95.0)               | -0.008 |
| GFR, n (%)                                 | On Dialysis                               | 604 ( 2.9)              | 1759 ( 3.9)                | 0.095                     | 461 ( 3.7)              | 478 ( 3.9)                 | 0.017  |
|                                            | ≤30                                       | 973 ( 4.7)              | 2001 ( 4.4)                | .                         | 592 ( 4.8)              | 614 ( 5.0)                 | .      |
|                                            | 30-60                                     | 8741 (41.8)             | 17182 (37.8)               | .                         | 5093 (41.3)             | 5148 (41.7)                | .      |
|                                            | >60                                       | 10572 (50.6)            | 24461 (53.9)               | .                         | 6188 (50.2)             | 6094 (49.4)                | .      |
| Left main stenosis≥50%, n (%)              | Yes                                       | 1601 ( 7.7)             | 4484 ( 9.9)                | 0.078                     | 1119 ( 9.1)             | 1138 ( 9.2)                | 0.005  |
| Proximal LAD, n (%)                        | Yes                                       | 3238 (15.5)             | 8979 (19.8)                | 0.112                     | 2286 (18.5)             | 2360 (19.1)                | 0.015  |
| Prior MI, n (%)                            | Yes                                       | 4527 (21.7)             | 10855 (23.9)               | 0.053                     | 3092 (25.1)             | 3134 (25.4)                | 0.008  |
| Endocarditis, n(%)                         | Yes                                       | 222 ( 1.1)              | 401 ( 0.9)                 | -0.018                    | 138 ( 1.1)              | 121 ( 1.0)                 | -0.014 |
| Prior Stroke/TIA                           | Yes                                       | 4367 (20.9)             | 7512 (16.5)                | -0.112                    | 2388 (19.4)             | 2304 (18.7)                | -0.017 |
| Carotid Stenosis, n (%)                    | One/Both                                  | 3485 (16.7)             | 8925 (19.7)                | 0.077                     | 2310 (18.7)             | 2331 (18.9)                | 0.004  |



|                                       | <i>Level</i>    | <i>Before Matching<sup>[A]</sup></i><br><i>N=66293</i> |                                    |                                          | <i>After Matching</i><br><i>N=24668</i> |                                    |                                          |
|---------------------------------------|-----------------|--------------------------------------------------------|------------------------------------|------------------------------------------|-----------------------------------------|------------------------------------|------------------------------------------|
|                                       |                 | <i>OAC(+)</i><br><i>(N=20890)</i>                      | <i>DAPT(+)</i><br><i>(N=45403)</i> | <i>Standardized</i><br><i>Difference</i> | <i>OAC(+)</i><br><i>(N=12334)</i>       | <i>DAPT(+)</i><br><i>(N=12334)</i> | <i>Standardized</i><br><i>Difference</i> |
| Prior PAD, n (%)                      | Yes             | 5284 (25.3)                                            | 11454 (25.2)                       | -0.002                                   | 3224 (26.1)                             | 3268 (26.5)                        | 0.008                                    |
| Smoking status, n (%)                 | Yes             | 751 ( 3.6)                                             | 2294 ( 5.1)                        | 0.072                                    | 510 ( 4.1)                              | 527 ( 4.3)                         | 0.007                                    |
| Diabetes, n (%)                       | Yes             | 7680 (36.8)                                            | 17175 (37.8)                       | 0.022                                    | 4622 (37.5)                             | 4610 (37.4)                        | -0.002                                   |
| NYHA, n (%)                           | Class IV        | 3777 (18.1)                                            | 6649 (14.6)                        | -0.093                                   | 2150 (17.4)                             | 2181 (17.7)                        | 0.007                                    |
| Atrial Fibrillation/Flutter, n (%)    | Yes             | 17072 (81.7)                                           | 8773 (19.3)                        | -1.597                                   | 8517 (69.1)                             | 8537 (69.2)                        | 0.004                                    |
| Conduction defect, n (%)              | Yes             | 8072 (38.6)                                            | 16316 (35.9)                       | -0.056                                   | 4790 (38.8)                             | 4927 (39.9)                        | 0.023                                    |
| Chronic Lung disease, n (%)           | Severe          | 2702 (12.9)                                            | 5171 (11.4)                        | -0.047                                   | 1577 (12.8)                             | 1569 (12.7)                        | -0.002                                   |
| Home Oxygen, n (%)                    | Yes             | 2321 (11.1)                                            | 4280 ( 9.4)                        | -0.056                                   | 1349 (10.9)                             | 1381 (11.2)                        | 0.008                                    |
| Hostile Chest, n (%)                  | Yes             | 1517 ( 7.3)                                            | 3597 ( 7.9)                        | 0.025                                    | 940 ( 7.6)                              | 935 ( 7.6)                         | -0.002                                   |
| Porcelain Aorta, n (%)                | Yes             | 807 ( 3.9)                                             | 1819 ( 4.0)                        | 0.007                                    | 496 ( 4.0)                              | 464 ( 3.8)                         | -0.013                                   |
| Prior CIED, n (%)                     | Yes             | 5528 (26.5)                                            | 5987 (13.2)                        | -0.338                                   | 2660 (21.6)                             | 2640 (21.4)                        | -0.004                                   |
| Prior PCI, n (%)                      | Yes             | 5648 (27.0)                                            | 17137 (37.7)                       | 0.230                                    | 4390 (35.6)                             | 4455 (36.1)                        | 0.011                                    |
| Prior Aortic/Cardiac procedure, n (%) | Yes             | 6855 (32.8)                                            | 13647 (30.1)                       | -0.059                                   | 3993 (32.4)                             | 4007 (32.5)                        | 0.002                                    |
| Aortic Etiology, n (%)                |                 | 19639 (94.0)                                           | 43171 (95.1)                       | 0.047                                    | 11662 (94.6)                            | 11681 (94.7)                       | 0.007                                    |
| Valve Morphology, n (%)               | Tricuspid       | 18731 (89.7)                                           | 40692 (89.6)                       | -0.001                                   | 11057 (89.6)                            | 11054 (89.6)                       | -0.001                                   |
| Aortic Insufficiency, n (%)           | Moderate/Severe | 3919 (18.8)                                            | 8865 (19.5)                        | 0.019                                    | 2431 (19.7)                             | 2402 (19.5)                        | -0.006                                   |
| Mitral Insufficiency, n (%)           | Moderate/Severe | 6755 (32.3)                                            | 11018 (24.3)                       | -0.180                                   | 3688 (29.9)                             | 3663 (29.7)                        | -0.004                                   |
| Tricuspid Insufficiency, n (%)        | Moderate/Severe | 7061 (33.8)                                            | 7936 (17.5)                        | -0.381                                   | 3248 (26.3)                             | 3181 (25.8)                        | -0.012                                   |
| Acuity, n (%)                         | Salvage         | 66 ( 0.3)                                              | 165 ( 0.4)                         | 0.090                                    | 44 ( 0.4)                               | 49 ( 0.4)                          | 0.011                                    |

|                                        |                          | <i>Before Matching<sup>[A]</sup></i><br><i>N=66293</i> |                                    |                                          | <i>After Matching</i><br><i>N=24668</i> |                                    |                                          |
|----------------------------------------|--------------------------|--------------------------------------------------------|------------------------------------|------------------------------------------|-----------------------------------------|------------------------------------|------------------------------------------|
|                                        | <i>Level</i>             | <i>OAC(+)</i><br><i>(N=20890)</i>                      | <i>DAPT(+)</i><br><i>(N=45403)</i> | <i>Standardized</i><br><i>Difference</i> | <i>OAC(+)</i><br><i>(N=12334)</i>       | <i>DAPT(+)</i><br><i>(N=12334)</i> | <i>Standardized</i><br><i>Difference</i> |
|                                        | Emergency                | 777 ( 3.7)                                             | 1088 ( 2.4)                        | .                                        | 397 ( 3.2)                              | 380 ( 3.1)                         | .                                        |
|                                        | Urgent                   | 1651 ( 7.9)                                            | 3087 ( 6.8)                        | .                                        | 1013 ( 8.2)                             | 1024 ( 8.3)                        | .                                        |
|                                        | Elective                 | 18396 (88.1)                                           | 41063 (90.4)                       | .                                        | 10880 (88.2)                            | 10881 (88.2)                       | .                                        |
| Heart Failure w/in 2 weeks, n (%)      | Yes                      | 16872 (80.8)                                           | 34696 (76.4)                       | -0.106                                   | 9826 (79.7)                             | 9777 (79.3)                        | -0.010                                   |
| Hypertension, n (%)                    | Yes                      | 18859 (90.3)                                           | 40752 (89.8)                       | -0.017                                   | 11127 (90.2)                            | 11116 (90.1)                       | -0.003                                   |
| Vascular Disease, n (%)                | Yes                      | 11296 (54.1)                                           | 26167 (57.6)                       | 0.072                                    | 7164 (58.1)                             | 7252 (58.8)                        | 0.015                                    |
| TAVR year, n (%)                       | Upto May 2017            | 4353 (20.8)                                            | 8947 (19.7)                        | 0.035                                    | 2380 (19.3)                             | 2371 (19.2)                        | 0.018                                    |
|                                        | 2016                     | 7813 (37.4)                                            | 17214 (37.9)                       | .                                        | 4562 (37.0)                             | 4522 (36.7)                        | .                                        |
|                                        | 2015                     | 4869 (23.3)                                            | 10481 (23.1)                       | .                                        | 2904 (23.5)                             | 2915 (23.6)                        | .                                        |
|                                        | 2014                     | 2437 (11.7)                                            | 5419 (11.9)                        | .                                        | 1551 (12.6)                             | 1543 (12.5)                        | .                                        |
|                                        | 2013                     | 807 ( 3.9)                                             | 1899 ( 4.2)                        | .                                        | 535 ( 4.3)                              | 543 ( 4.4)                         | .                                        |
|                                        | 2012                     | 611 ( 2.9)                                             | 1443 ( 3.2)                        | .                                        | 402 ( 3.3)                              | 440 ( 3.6)                         | .                                        |
| In-hospital Atrial Fibrillation, n (%) | Yes                      | 634 ( 3.0)                                             | 857 ( 1.9)                         | -0.074                                   | 526 ( 4.3)                              | 485 ( 3.9)                         | -0.017                                   |
| General Anesthesia, n (%)              | Yes                      | 14821 (70.9)                                           | 31902 (70.3)                       | -0.015                                   | 8834 (71.6)                             | 8833 (71.6)                        | -0.000                                   |
| Failed Bioprosthetic Valve, n (%)      | Yes                      | 719 ( 3.4)                                             | 1321 ( 2.9)                        | -0.030                                   | 411 ( 3.3)                              | 422 ( 3.4)                         | 0.005                                    |
| Valve Type, n (%)                      | Balloon Expandable Valve | 14840 (71.0)                                           | 32602 (71.8)                       | 0.017                                    | 8799 (71.3)                             | 8786 (71.2)                        | -0.002                                   |

BSA = body surface area. CIED = cardiac implantable electrical device. DAPT = dual antiplatelet therapy. GFR = glomerular filtration rate. LAD = left anterior descending artery. LVEF = left ventricular ejection fraction. MI = myocardial infarction. NYHA = New York Heart Association. OAC = oral anticoagulant. PAD = peripheral arterial disease. PCI = percutaneous coronary intervention. TAVR = transcatheter aortic valve replacement. TIA = transient ischemic attack. Only patients receiving exactly one therapy (DAPT or OAC) are considered for this matching

**eTable 10. Characteristics of Propensity Score Matched Patients on Dual Antiplatelet Therapy (Non-femoral Cohort)**

| Level                                         | Before Matching<br>N=14770 |                      |                            | After Matching<br>N=6338 |                      |                            |        |
|-----------------------------------------------|----------------------------|----------------------|----------------------------|--------------------------|----------------------|----------------------------|--------|
|                                               | DAPT(-)<br>(N=6343)        | DAPT(+)<br>(N=8427)  | Standardized<br>Difference | DAPT(-)<br>(N=3169)      | DAPT(+)<br>(N=3169)  | Standardized<br>Difference |        |
| Age (Median, IQR)                             | 82.0 ( 76.0, 87.0)         | 81.0 ( 75.0, 86.0)   | -0.115                     | 82.0 ( 76.0, 87.0)       | 82.0 ( 76.0, 87.0)   | -0.014                     |        |
| BSA (m <sup>2</sup> , Median, IQR)            | 1.8 (1.6, 2.0)             | 1.8 (1.6, 2.0)       | -0.013                     | 1.8 (1.6, 2.0)           | 1.8 (1.6, 2.0)       | 0.008                      |        |
| LVEF (Median, IQR)                            | 57.0 ( 47.0, 60.0)         | 57.0 ( 45.0, 60.0)   | -0.015                     | 58.0 ( 48.0, 60.0)       | 58.0 ( 48.0, 60.0)   | -0.007                     |        |
| Hemoglobin (g/dL, Median, IQR)                | 11.7 ( 10.4, 12.9)         | 11.8 ( 10.5, 13.0)   | 0.040                      | 11.6 ( 10.3, 12.8)       | 11.6 ( 10.3, 12.8)   | -0.005                     |        |
| Platelet Count (per 1000 $\mu$ , Median, IQR) | 194.0 (153.0, 239.0)       | 199.0 (161.0, 246.0) | 0.107                      | 195.0 (152.0, 241.0)     | 196.0 (159.0, 239.0) | 0.028                      |        |
| Female, n (%)                                 | Yes                        | 3346 (52.8)          | 4300 (51.0)                | -0.035                   | 1673 (52.8)          | 1651 (52.1)                | -0.014 |
| Race, n (%)                                   | Yes                        | 6000 (94.6)          | 7884 (93.6)                | -0.044                   | 2949 (93.1)          | 2941 (92.8)                | -0.010 |
| GFR, n (%)                                    | On Dialysis                | 273 ( 4.3)           | 395 ( 4.7)                 | 0.081                    | 157 ( 5.0)           | 149 ( 4.7)                 | 0.012  |
|                                               | ≤30                        | 397 ( 6.3)           | 437 ( 5.2)                 | .                        | 195 ( 6.2)           | 195 ( 6.2)                 | .      |
|                                               | 30-60                      | 2692 (42.4)          | 3346 (39.7)                | .                        | 1322 (41.7)          | 1324 (41.8)                | .      |
|                                               | >60                        | 2981 (47.0)          | 4249 (50.4)                | .                        | 1495 (47.2)          | 1501 (47.4)                | .      |
| Left main stenosis≥50%, n (%)                 | Yes                        | 713 (11.2)           | 1205 (14.3)                | 0.092                    | 376 (11.9)           | 397 (12.5)                 | 0.020  |
| Proximal LAD, n (%)                           | Yes                        | 1222 (19.3)          | 2063 (24.5)                | 0.126                    | 649 (20.5)           | 684 (21.6)                 | 0.027  |
| Prior MI, n (%)                               | Yes                        | 1682 (26.5)          | 2635 (31.3)                | 0.105                    | 872 (27.5)           | 872 (27.5)                 | 0.000  |
| Endocarditis, n(%)                            | Yes                        | 58 ( 0.9)            | 45 ( 0.5)                  | -0.045                   | 23 ( 0.7)            | 20 ( 0.6)                  | -0.012 |
| Prior Stroke/TIA                              | Yes                        | 1326 (20.9)          | 1718 (20.4)                | -0.013                   | 619 (19.5)           | 658 (20.8)                 | 0.031  |
| Carotid Stenosis, n (%)                       | One/Both                   | 1755 (27.7)          | 2649 (31.4)                | 0.083                    | 904 (28.5)           | 922 (29.1)                 | 0.013  |
| Prior PAD, n (%)                              | Yes                        | 3281 (51.7)          | 4617 (54.8)                | 0.061                    | 1626 (51.3)          | 1670 (52.7)                | 0.028  |
| Smoking status, n (%)                         | Yes                        | 599 ( 9.4)           | 1036 (12.3)                | 0.092                    | 338 (10.7)           | 326 (10.3)                 | -0.012 |
| Diabetes, n (%)                               | Yes                        | 2398 (37.8)          | 3265 (38.7)                | 0.019                    | 1186 (37.4)          | 1245 (39.3)                | 0.038  |
| NYHA, n (%)                                   | Class IV                   | 1247 (19.7)          | 1580 (18.7)                | -0.023                   | 629 (19.8)           | 615 (19.4)                 | -0.011 |

|                                       |                 | <i>Before Matching</i><br><i>N=14770</i> |                                   |                                          | <i>After Matching</i><br><i>N=6338</i> |                                   |                                          |
|---------------------------------------|-----------------|------------------------------------------|-----------------------------------|------------------------------------------|----------------------------------------|-----------------------------------|------------------------------------------|
|                                       | <i>Level</i>    | <i>DAPT(-)</i><br><i>(N=6343)</i>        | <i>DAPT(+)</i><br><i>(N=8427)</i> | <i>Standardized</i><br><i>Difference</i> | <i>DAPT(-)</i><br><i>(N=3169)</i>      | <i>DAPT(+)</i><br><i>(N=3169)</i> | <i>Standardized</i><br><i>Difference</i> |
| Atrial Fibrillation/Flutter, n (%)    | Yes             | 3598 (56.7)                              | 2296 (27.2)                       | -0.626                                   | 1237 (39.0)                            | 1211 (38.2)                       | -0.017                                   |
| Conduction defect, n (%)              | Yes             | 2072 (32.7)                              | 2716 (32.2)                       | -0.009                                   | 991 (31.3)                             | 1006 (31.7)                       | 0.010                                    |
| Chronic Lung disease, n (%)           | Severe          | 1001 (15.8)                              | 1383 (16.4)                       | 0.017                                    | 497 (15.7)                             | 506 (16.0)                        | 0.008                                    |
| Home Oxygen, n (%)                    | Yes             | 943 (14.9)                               | 1175 (13.9)                       | -0.026                                   | 446 (14.1)                             | 465 (14.7)                        | 0.017                                    |
| Hostile Chest, n (%)                  | Yes             | 536 ( 8.5)                               | 838 ( 9.9)                        | 0.052                                    | 266 ( 8.4)                             | 282 ( 8.9)                        | 0.018                                    |
| Porcelain Aorta, n (%)                | Yes             | 662 (10.4)                               | 886 (10.5)                        | 0.003                                    | 313 ( 9.9)                             | 333 (10.5)                        | 0.021                                    |
| Prior CIED, n (%)                     | Yes             | 1292 (20.4)                              | 1243 (14.8)                       | -0.148                                   | 550 (17.4)                             | 545 (17.2)                        | -0.004                                   |
| Prior PCI, n (%)                      | Yes             | 2016 (31.8)                              | 3753 (44.5)                       | 0.265                                    | 1113 (35.1)                            | 1145 (36.1)                       | 0.021                                    |
| Prior Aortic/Cardiac procedure, n (%) | Yes             | 2428 (38.3)                              | 3423 (40.6)                       | 0.048                                    | 1211 (38.2)                            | 1211 (38.2)                       | 0.000                                    |
| Aortic Etiology, n (%)                |                 | 6009 (94.7)                              | 8036 (95.4)                       | 0.029                                    | 3022 (95.4)                            | 3015 (95.1)                       | -0.010                                   |
| Valve Morphology, n (%)               | Tricuspid       | 5783 (91.2)                              | 7771 (92.2)                       | 0.038                                    | 2885 (91.0)                            | 2900 (91.5)                       | 0.017                                    |
| Aortic Insufficiency, n (%)           | Moderate/Severe | 1292 (20.4)                              | 1764 (20.9)                       | 0.014                                    | 680 (21.5)                             | 678 (21.4)                        | -0.002                                   |
| Mitral Insufficiency, n (%)           | Moderate/Severe | 1880 (29.6)                              | 2282 (27.1)                       | -0.057                                   | 861 (27.2)                             | 870 (27.5)                        | 0.006                                    |
| Tricuspid Insufficiency, n (%)        | Moderate/Severe | 1679 (26.5)                              | 1543 (18.3)                       | -0.197                                   | 682 (21.5)                             | 660 (20.8)                        | -0.017                                   |
| Acuity, n (%)                         | Salvage         | 28 ( 0.4)                                | 38 ( 0.5)                         | 0.032                                    | 15 ( 0.5)                              | 14 ( 0.4)                         | 0.023                                    |
|                                       | Emergency       | 229 ( 3.6)                               | 279 ( 3.3)                        | .                                        | 111 ( 3.5)                             | 119 ( 3.8)                        | .                                        |
|                                       | Urgent          | 541 ( 8.5)                               | 658 ( 7.8)                        | .                                        | 262 ( 8.3)                             | 246 ( 7.8)                        | .                                        |
|                                       | Elective        | 5545 (87.4)                              | 7452 (88.4)                       | .                                        | 2781 (87.8)                            | 2790 (88.0)                       | .                                        |
| Heart Failure w/in 2 weeks, n (%)     | Yes             | 5030 (79.3)                              | 6361 (75.5)                       | -0.091                                   | 2476 (78.1)                            | 2477 (78.2)                       | 0.001                                    |
| Hypertension, n (%)                   | Yes             | 5775 (91.0)                              | 7762 (92.1)                       | 0.038                                    | 2868 (90.5)                            | 2890 (91.2)                       | 0.024                                    |
| Vascular Disease, n (%)               | Yes             | 4642 (73.2)                              | 6577 (78.0)                       | 0.113                                    | 2331 (73.6)                            | 2368 (74.7)                       | 0.027                                    |

|                                        |                                | <i>Before Matching</i><br>N=14770 |                            |                                          | <i>After Matching</i><br>N=6338 |                            |                                          |
|----------------------------------------|--------------------------------|-----------------------------------|----------------------------|------------------------------------------|---------------------------------|----------------------------|------------------------------------------|
|                                        | <i>Level</i>                   | <i>DAPT(-)</i><br>(N=6343)        | <i>DAPT(+)</i><br>(N=8427) | <i>Standardized</i><br><i>Difference</i> | <i>DAPT(-)</i><br>(N=3169)      | <i>DAPT(+)</i><br>(N=3169) | <i>Standardized</i><br><i>Difference</i> |
| TAVR year, n (%)                       | Upto May 2017                  | 397 ( 6.3)                        | 575 ( 6.8)                 | 0.091                                    | 188 ( 5.9)                      | 177 ( 5.6)                 | 0.044                                    |
|                                        | 2016                           | 937 (14.8)                        | 1403 (16.6)                | .                                        | 417 (13.2)                      | 432 (13.6)                 | .                                        |
|                                        | 2015                           | 1128 (17.8)                       | 1566 (18.6)                | .                                        | 562 (17.7)                      | 590 (18.6)                 | .                                        |
|                                        | 2014                           | 1818 (28.7)                       | 2219 (26.3)                | .                                        | 907 (28.6)                      | 887 (28.0)                 | .                                        |
|                                        | 2013                           | 1646 (25.9)                       | 2225 (26.4)                | .                                        | 856 (27.0)                      | 870 (27.5)                 | .                                        |
|                                        | 2012                           | 417 ( 6.6)                        | 439 ( 5.2)                 | .                                        | 239 ( 7.5)                      | 213 ( 6.7)                 | .                                        |
| In-hospital Atrial Fibrillation, n (%) | Yes                            | 778 (12.3)                        | 766 ( 9.1)                 | -0.103                                   | 350 (11.0)                      | 366 (11.5)                 | 0.016                                    |
| General Anesthesia, n (%)              | Yes                            | 6238 (98.3)                       | 8233 (97.7)                | -0.047                                   | 3112 (98.2)                     | 3108 (98.1)                | -0.009                                   |
| Failed Bioprosthetic Valve, n (%)      | Yes                            | 124 ( 2.0)                        | 146 ( 1.7)                 | -0.017                                   | 58 ( 1.8)                       | 60 ( 1.9)                  | 0.005                                    |
| Valve Type, n (%)                      | Balloon<br>Expandable<br>Valve | 5574 (87.9)                       | 7174 (85.1)                | -0.080                                   | 2808 (88.6)                     | 2818 (88.9)                | 0.010                                    |
| Anticoagulant Therapy, n (%)           | Yes                            | 3839 (60.5)                       | 666 ( 7.9)                 | -1.333                                   | 670 (21.1)                      | 666 (21.0)                 | -0.003                                   |

BSA = body surface area. CIED = cardiac implantable electrical device. DAPT = dual antiplatelet therapy. GFR = glomerular filtration rate. LAD = left anterior descending artery. LVEF = left ventricular ejection fraction. MI = myocardial infarction. NYHA = New York Heart Association. PAD = peripheral arterial disease. PCI = percutaneous coronary intervention. TAVR = transcatheter aortic valve replacement. TIA = transient ischemic attack.

**eTable 11. Characteristics of Propensity Score Matched Patients on Oral Anticoagulant Therapy (Non-femoral Cohort)**

|                                            | <i>Level</i> | <i>Before Matching<br/>N=14770</i> |                            |                                    | <i>After Matching<br/>N=4608</i> |                            |                                    |
|--------------------------------------------|--------------|------------------------------------|----------------------------|------------------------------------|----------------------------------|----------------------------|------------------------------------|
|                                            |              | <i>OAC(-)<br/>(N=10265)</i>        | <i>OAC(+)<br/>(N=4505)</i> | <i>Standardized<br/>Difference</i> | <i>OAC(-)<br/>(N=2304)</i>       | <i>OAC(+)<br/>(N=2304)</i> | <i>Standardized<br/>Difference</i> |
| Age (Median, IQR)                          |              | 82.0 ( 75.0,<br>86.0)              | 82.0 ( 76.0,<br>86.0)      | 0.051                              | 82.0 ( 76.0,<br>87.0)            | 82.0 ( 75.0,<br>86.0)      | -0.010                             |
| BSA (m <sup>2</sup> , Median, IQR)         |              | 1.8 (1.6, 2.0)                     | 1.8 (1.7, 2.0)             | 0.162                              | 1.8 (1.7, 2.0)                   | 1.8 (1.7, 2.0)             | 0.007                              |
| LVEF (Median, IQR)                         |              | 58.0 ( 47.0,<br>60.0)              | 55.0 ( 45.0,<br>60.0)      | -0.049                             | 57.0 ( 45.5,<br>60.0)            | 57.0 ( 47.0,<br>60.0)      | 0.003                              |
| Hemoglobin (g/dL, Median, IQR)             |              | 11.7 ( 10.4,<br>12.9)              | 11.8 ( 10.6,<br>13.0)      | 0.067                              | 11.6 ( 10.3,<br>12.9)            | 11.7 ( 10.4,<br>13.0)      | 0.019                              |
| Platelet Count (per 1000μ,<br>Median, IQR) |              | 198.0 (159.0,<br>245.0)            | 194.0 (157.0,<br>239.0)    | -0.050                             | 195.5 (151.0,<br>242.0)          | 195.0 (157.0,<br>239.0)    | 0.027                              |
| Female, n (%)                              | Yes          | 5386 (52.5)                        | 2260 (50.2)                | -0.046                             | 1169 (50.7)                      | 1175 (51.0)                | 0.005                              |
| Race, n (%)                                | Yes          | 9545 (93.0)                        | 4339 (96.3)                | 0.148                              | 2181 (94.7)                      | 2183 (94.7)                | 0.004                              |
| GFR, n (%)                                 | On Dialysis  | 498 ( 4.9)                         | 170 ( 3.8)                 | 0.074                              | 102 ( 4.4)                       | 91 ( 3.9)                  | 0.027                              |
|                                            | ≤30          | 549 ( 5.3)                         | 285 ( 6.3)                 | .                                  | 151 ( 6.6)                       | 153 ( 6.6)                 | .                                  |
|                                            | 30-60        | 4145 (40.4)                        | 1893 (42.0)                | .                                  | 973 (42.2)                       | 965 (41.9)                 | .                                  |
|                                            | >60          | 5073 (49.4)                        | 2157 (47.9)                | .                                  | 1078 (46.8)                      | 1095 (47.5)                | .                                  |
| Left main stenosis≥50%, n (%)              | Yes          | 1399 (13.6)                        | 519 (11.5)                 | -0.064                             | 275 (11.9)                       | 283 (12.3)                 | 0.011                              |
| Proximal LAD, n (%)                        | Yes          | 2362 (23.0)                        | 923 (20.5)                 | -0.061                             | 468 (20.3)                       | 494 (21.4)                 | 0.028                              |
| Prior MI, n (%)                            | Yes          | 3088 (30.1)                        | 1229 (27.3)                | -0.062                             | 639 (27.7)                       | 673 (29.2)                 | 0.033                              |
| Endocarditis, n(%)                         | Yes          | 61 ( 0.6)                          | 42 ( 0.9)                  | 0.039                              | 21 ( 0.9)                        | 21 ( 0.9)                  | 0.000                              |
| Prior Stroke/TIA                           | Yes          | 2009 (19.6)                        | 1035 (23.0)                | 0.083                              | 500 (21.7)                       | 486 (21.1)                 | -0.015                             |
| Carotid Stenosis, n (%)                    | One/Both     | 3130 (30.5)                        | 1274 (28.3)                | -0.049                             | 651 (28.3)                       | 667 (28.9)                 | 0.015                              |

|                                       | <i>Level</i>        | <i>Before Matching<br/>N=14770</i> |                            |                                    | <i>After Matching<br/>N=4608</i> |                            |                                    |
|---------------------------------------|---------------------|------------------------------------|----------------------------|------------------------------------|----------------------------------|----------------------------|------------------------------------|
|                                       |                     | <i>OAC(-)<br/>(N=10265)</i>        | <i>OAC(+)<br/>(N=4505)</i> | <i>Standardized<br/>Difference</i> | <i>OAC(-)<br/>(N=2304)</i>       | <i>OAC(+)<br/>(N=2304)</i> | <i>Standardized<br/>Difference</i> |
| Prior PAD, n (%)                      | Yes                 | 5517 (53.7)                        | 2381 (52.9)                | -0.018                             | 1216 (52.8)                      | 1210 (52.5)                | -0.005                             |
| Smoking status, n (%)                 | Yes                 | 1233 (12.0)                        | 402 ( 8.9)                 | -0.101                             | 245 (10.6)                       | 239 (10.4)                 | -0.009                             |
| Diabetes, n (%)                       | Yes                 | 3916 (38.1)                        | 1747 (38.8)                | 0.013                              | 902 (39.1)                       | 872 (37.8)                 | -0.027                             |
| NYHA, n (%)                           | Class IV            | 1942 (18.9)                        | 885 (19.6)                 | 0.018                              | 467 (20.3)                       | 488 (21.2)                 | 0.023                              |
| Atrial Fibrillation/Flutter, n (%)    | Yes                 | 2580 (25.1)                        | 3314 (73.6)                | 1.107                              | 1245 (54.0)                      | 1239 (53.8)                | -0.005                             |
| Conduction defect, n (%)              | Yes                 | 3267 (31.8)                        | 1521 (33.8)                | 0.041                              | 747 (32.4)                       | 766 (33.2)                 | 0.018                              |
| Chronic Lung disease, n (%)           | Severe              | 1658 (16.2)                        | 726 (16.1)                 | -0.001                             | 370 (16.1)                       | 395 (17.1)                 | 0.029                              |
| Home Oxygen, n (%)                    | Yes                 | 1435 (14.0)                        | 683 (15.2)                 | 0.034                              | 354 (15.4)                       | 360 (15.6)                 | 0.007                              |
| Hostile Chest, n (%)                  | Yes                 | 952 ( 9.3)                         | 422 ( 9.4)                 | 0.003                              | 195 ( 8.5)                       | 222 ( 9.6)                 | 0.041                              |
| Porcelain Aorta, n (%)                | Yes                 | 1052 (10.2)                        | 496 (11.0)                 | 0.025                              | 234 (10.2)                       | 249 (10.8)                 | 0.021                              |
| Prior CIED, n (%)                     | Yes                 | 1482 (14.4)                        | 1053 (23.4)                | 0.230                              | 448 (19.4)                       | 466 (20.2)                 | 0.020                              |
| Prior PCI, n (%)                      | Yes                 | 4183 (40.8)                        | 1586 (35.2)                | -0.114                             | 874 (37.9)                       | 881 (38.2)                 | 0.006                              |
| Prior Aortic/Cardiac procedure, n (%) | Yes                 | 4057 (39.5)                        | 1794 (39.8)                | 0.006                              | 902 (39.1)                       | 920 (39.9)                 | 0.016                              |
| Aortic Etiology, n (%)                |                     | 9794 (95.4)                        | 4251 (94.4)                | -0.048                             | 2179 (94.6)                      | 2187 (94.9)                | 0.016                              |
| Valve Morphology, n (%)               | Tricuspid           | 9397 (91.5)                        | 4157 (92.3)                | 0.027                              | 2111 (91.6)                      | 2108 (91.5)                | -0.005                             |
| Aortic Insufficiency, n (%)           | Moderate/<br>Severe | 2167 (21.1)                        | 889 (19.7)                 | -0.034                             | 468 (20.3)                       | 476 (20.7)                 | 0.009                              |
| Mitral Insufficiency, n (%)           | Moderate/<br>Severe | 2707 (26.4)                        | 1455 (32.3)                | 0.130                              | 667 (28.9)                       | 696 (30.2)                 | 0.028                              |
| Tricuspid Insufficiency, n (%)        | Moderate/<br>Severe | 1842 (17.9)                        | 1380 (30.6)                | 0.299                              | 559 (24.3)                       | 560 (24.3)                 | 0.001                              |
| Acuity, n (%)                         | Salvage             | 47 ( 0.5)                          | 19 ( 0.4)                  | 0.031                              | 13 ( 0.6)                        | 11 ( 0.5)                  | 0.042                              |

|                                        |                                 | <i>Before Matching</i><br><i>N=14770</i> |                                  |                                          | <i>After Matching</i><br><i>N=4608</i> |                                  |                                          |
|----------------------------------------|---------------------------------|------------------------------------------|----------------------------------|------------------------------------------|----------------------------------------|----------------------------------|------------------------------------------|
|                                        | <i>Level</i>                    | <i>OAC(-)</i><br><i>(N=10265)</i>        | <i>OAC(+)</i><br><i>(N=4505)</i> | <i>Standardized</i><br><i>Difference</i> | <i>OAC(-)</i><br><i>(N=2304)</i>       | <i>OAC(+)</i><br><i>(N=2304)</i> | <i>Standardized</i><br><i>Difference</i> |
|                                        | Emergency                       | 341 ( 3.3)                               | 167 ( 3.7)                       | .                                        | 93 ( 4.0)                              | 80 ( 3.5)                        | .                                        |
|                                        | Urgent                          | 815 ( 7.9)                               | 384 ( 8.5)                       | .                                        | 195 ( 8.5)                             | 214 ( 9.3)                       | .                                        |
|                                        | Elective                        | 9062 (88.3)                              | 3935 (87.3)                      | .                                        | 2003 (86.9)                            | 1999 (86.8)                      | .                                        |
| Heart Failure w/in 2 weeks, n (%)      | Yes                             | 7831 (76.3)                              | 3560 (79.0)                      | 0.066                                    | 1782 (77.3)                            | 1814 (78.7)                      | 0.034                                    |
| Hypertension, n (%)                    | Yes                             | 9388 (91.5)                              | 4149 (92.1)                      | 0.023                                    | 2118 (91.9)                            | 2113 (91.7)                      | -0.008                                   |
| Vascular Disease, n (%)                | Yes                             | 7868 (76.6)                              | 3351 (74.4)                      | -0.053                                   | 1712 (74.3)                            | 1730 (75.1)                      | 0.018                                    |
| TAVR year, n (%)                       | Upto May<br>2017                | 666 ( 6.5)                               | 306 ( 6.8)                       | 0.067                                    | 136 ( 5.9)                             | 137 ( 5.9)                       | 0.042                                    |
|                                        | 2016                            | 1604 (15.6)                              | 736 (16.3)                       | .                                        | 329 (14.3)                             | 339 (14.7)                       | .                                        |
|                                        | 2015                            | 1863 (18.1)                              | 831 (18.4)                       | .                                        | 402 (17.4)                             | 427 (18.5)                       | .                                        |
|                                        | 2014                            | 2758 (26.9)                              | 1279 (28.4)                      | .                                        | 646 (28.0)                             | 648 (28.1)                       | .                                        |
|                                        | 2013                            | 2747 (26.8)                              | 1124 (25.0)                      | .                                        | 640 (27.8)                             | 615 (26.7)                       | .                                        |
|                                        | 2012                            | 627 ( 6.1)                               | 229 ( 5.1)                       | .                                        | 151 ( 6.6)                             | 138 ( 6.0)                       | .                                        |
| In-hospital Atrial Fibrillation, n (%) | Yes                             | 965 ( 9.4)                               | 579 (12.9)                       | 0.110                                    | 372 (16.1)                             | 366 (15.9)                       | -0.007                                   |
| General Anesthesia, n (%)              | Yes                             | 10051 (97.9)                             | 4420 (98.1)                      | 0.014                                    | 2262 (98.2)                            | 2261 (98.1)                      | -0.003                                   |
| Failed Bioprosthetic Valve, n (%)      | Yes                             | 183 ( 1.8)                               | 87 ( 1.9)                        | 0.011                                    | 41 ( 1.8)                              | 43 ( 1.9)                        | 0.007                                    |
| Valve Type, n (%)                      | Balloon<br>Expandabl<br>e Valve | 8867 (86.4)                              | 3881 (86.1)                      | -0.007                                   | 2038 (88.5)                            | 2011 (87.3)                      | -0.036                                   |
| Dual Antiplatelet Therapy, n (%)       | Yes                             | 7761 (75.6)                              | 666 (14.8)                       | -1.544                                   | 684 (29.7)                             | 666 (28.9)                       | -0.017                                   |

BSA = body surface area. CIED = cardiac implantable electrical device. GFR = glomerular filtration rate. LAD = left anterior descending artery. LVEF = left ventricular ejection fraction. MI = myocardial infarction. NYHA = New York Heart Association. OAC = oral anticoagulant. PAD = peripheral arterial disease. PCI = percutaneous coronary intervention. TAVR = transcatheter aortic valve replacement. TIA = transient ischemic attack.



**eTable 12. Characteristics of Propensity Score Matched Patients on Dual Antiplatelet Therapy vs. Oral Anticoagulant Therapy (Non-femoral Cohort)**

|                                         |              | <i>Before Matching<br/>N=11600</i> |                             |                                    | <i>After Matching<br/>N=5550</i> |                             |                                    |
|-----------------------------------------|--------------|------------------------------------|-----------------------------|------------------------------------|----------------------------------|-----------------------------|------------------------------------|
|                                         | <i>Level</i> | <i>OAC(+)<br/>(N=3839)</i>         | <i>DAPT(+)<br/>(N=7761)</i> | <i>Standardized<br/>Difference</i> | <i>OAC(+)<br/>(N=2775)</i>       | <i>DAPT(+)<br/>(N=2775)</i> | <i>Standardized<br/>Difference</i> |
| Age (Median, IQR)                       |              | 82.0 ( 76.0,<br>87.0)              | 81.0 ( 75.0,<br>86.0)       | -0.102                             | 82.0 ( 76.0,<br>87.0)            | 82.0 ( 76.0,<br>87.0)       | -0.003                             |
| BSA (m <sup>2</sup> , Median, IQR)      |              | 1.8 (1.7, 2.0)                     | 1.8 (1.6, 2.0)              | -0.117                             | 1.8 (1.7, 2.0)                   | 1.8 (1.6, 2.0)              | 0.002                              |
| LVEF (Median, IQR)                      |              | 56.0 ( 45.0,<br>60.0)              | 58.0 ( 45.0,<br>60.0)       | 0.024                              | 57.0 ( 45.0,<br>60.0)            | 57.0 ( 45.0,<br>60.0)       | -0.014                             |
| Hemoglobin (g/dL, Median, IQR)          |              | 11.8 ( 10.6,<br>13.1)              | 11.8 ( 10.5,<br>13.0)       | -0.038                             | 11.7 ( 10.5,<br>12.9)            | 11.7 ( 10.4,<br>12.9)       | -0.023                             |
| Platelet Count (per 1000μ, Median, IQR) |              | 195.0 (157.0,<br>239.0)            | 200.0 (162.0,<br>247.0)     | 0.089                              | 197.0 (158.0,<br>240.0)          | 198.0 (160.0,<br>242.0)     | 0.021                              |
| Female, n (%)                           | Yes          | 1969 (51.3)                        | 4009 (51.7)                 | 0.007                              | 1401 (50.5)                      | 1386 (49.9)                 | -0.011                             |
| Race, n (%)                             | Yes          | 3700 (96.4)                        | 7245 (93.4)                 | -0.138                             | 2655 (95.7)                      | 2650 (95.5)                 | -0.009                             |
| GFR, n (%)                              | On Dialysis  | 141 ( 3.7)                         | 366 ( 4.7)                  | 0.092                              | 128 ( 4.6)                       | 137 ( 4.9)                  | 0.023                              |
|                                         | ≤30          | 235 ( 6.1)                         | 387 ( 5.0)                  | .                                  | 150 ( 5.4)                       | 159 ( 5.7)                  | .                                  |
|                                         | 30-60        | 1633 (42.5)                        | 3086 (39.8)                 | .                                  | 1172 (42.2)                      | 1174 (42.3)                 | .                                  |
|                                         | >60          | 1830 (47.7)                        | 3922 (50.5)                 | .                                  | 1325 (47.7)                      | 1305 (47.0)                 | .                                  |
| Left main stenosis≥50%, n (%)           | Yes          | 420 (10.9)                         | 1106 (14.3)                 | 0.100                              | 357 (12.9)                       | 360 (13.0)                  | 0.003                              |
| Proximal LAD, n (%)                     | Yes          | 737 (19.2)                         | 1877 (24.2)                 | 0.121                              | 604 (21.8)                       | 625 (22.5)                  | 0.018                              |
| Prior MI, n (%)                         | Yes          | 1016 (26.5)                        | 2422 (31.2)                 | 0.105                              | 800 (28.8)                       | 828 (29.8)                  | 0.022                              |
| Endocarditis, n(%)                      | Yes          | 37 ( 1.0)                          | 40 ( 0.5)                   | -0.052                             | 19 ( 0.7)                        | 19 ( 0.7)                   | 0.000                              |
| Prior Stroke/TIA                        | Yes          | 880 (22.9)                         | 1563 (20.1)                 | -0.068                             | 614 (22.1)                       | 593 (21.4)                  | -0.018                             |

|                                       | <i>Level</i>    | <i>Before Matching</i><br><i>N=11600</i> |                                   |                                          | <i>After Matching</i><br><i>N=5550</i> |                                   |                                          |
|---------------------------------------|-----------------|------------------------------------------|-----------------------------------|------------------------------------------|----------------------------------------|-----------------------------------|------------------------------------------|
|                                       |                 | <i>OAC(+)</i><br><i>(N=3839)</i>         | <i>DAPT(+)</i><br><i>(N=7761)</i> | <i>Standardized</i><br><i>Difference</i> | <i>OAC(+)</i><br><i>(N=2775)</i>       | <i>DAPT(+)</i><br><i>(N=2775)</i> | <i>Standardized</i><br><i>Difference</i> |
| Carotid Stenosis, n (%)               | One/Both        | 1060 (27.6)                              | 2435 (31.4)                       | 0.083                                    | 809 (29.2)                             | 791 (28.5)                        | -0.014                                   |
| Prior PAD, n (%)                      | Yes             | 2026 (52.8)                              | 4262 (54.9)                       | 0.043                                    | 1511 (54.5)                            | 1525 (55.0)                       | 0.010                                    |
| Smoking status, n (%)                 | Yes             | 332 ( 8.6)                               | 966 (12.4)                        | 0.124                                    | 267 ( 9.6)                             | 270 ( 9.7)                        | 0.004                                    |
| Diabetes, n (%)                       | Yes             | 1472 (38.3)                              | 2990 (38.5)                       | 0.004                                    | 1063 (38.3)                            | 1042 (37.5)                       | -0.016                                   |
| NYHA, n (%)                           | Class IV        | 748 (19.5)                               | 1443 (18.6)                       | -0.023                                   | 548 (19.7)                             | 561 (20.2)                        | 0.012                                    |
| Atrial Fibrillation/Flutter, n (%)    | Yes             | 2844 (74.1)                              | 1826 (23.5)                       | -1.172                                   | 1782 (64.2)                            | 1789 (64.5)                       | 0.005                                    |
| Conduction defect, n (%)              | Yes             | 1301 (33.9)                              | 2496 (32.2)                       | -0.037                                   | 961 (34.6)                             | 980 (35.3)                        | 0.014                                    |
| Chronic Lung disease, n (%)           | Severe          | 615 (16.0)                               | 1272 (16.4)                       | 0.010                                    | 445 (16.0)                             | 437 (15.7)                        | -0.008                                   |
| Home Oxygen, n (%)                    | Yes             | 594 (15.5)                               | 1086 (14.0)                       | -0.042                                   | 413 (14.9)                             | 420 (15.1)                        | 0.007                                    |
| Hostile Chest, n (%)                  | Yes             | 348 ( 9.1)                               | 764 ( 9.8)                        | 0.027                                    | 268 ( 9.7)                             | 270 ( 9.7)                        | 0.002                                    |
| Porcelain Aorta, n (%)                | Yes             | 426 (11.1)                               | 816 (10.5)                        | -0.019                                   | 306 (11.0)                             | 302 (10.9)                        | -0.005                                   |
| Prior CIED, n (%)                     | Yes             | 893 (23.3)                               | 1083 (14.0)                       | -0.241                                   | 540 (19.5)                             | 569 (20.5)                        | 0.026                                    |
| Prior PCI, n (%)                      | Yes             | 1221 (31.8)                              | 3388 (43.7)                       | 0.246                                    | 1053 (37.9)                            | 1087 (39.2)                       | 0.025                                    |
| Prior Aortic/Cardiac procedure, n (%) | Yes             | 1507 (39.3)                              | 3136 (40.4)                       | 0.024                                    | 1095 (39.5)                            | 1095 (39.5)                       | 0.000                                    |
| Aortic Etiology, n (%)                |                 | 3617 (94.2)                              | 7402 (95.4)                       | 0.052                                    | 2632 (94.8)                            | 2643 (95.2)                       | 0.018                                    |
| Valve Morphology, n (%)               | Tricuspid       | 3530 (92.0)                              | 7144 (92.0)                       | 0.004                                    | 2570 (92.6)                            | 2553 (92.0)                       | -0.023                                   |
| Aortic Insufficiency, n (%)           | Moderate/Severe | 751 (19.6)                               | 1626 (21.0)                       | 0.035                                    | 543 (19.6)                             | 552 (19.9)                        | 0.008                                    |
| Mitral Insufficiency, n (%)           | Moderate/Severe | 1218 (31.7)                              | 2045 (26.3)                       | -0.119                                   | 838 (30.2)                             | 833 (30.0)                        | -0.004                                   |

|                                   | <i>Level</i>                           | <i>Before Matching</i><br><i>N=11600</i> |                                   |                                          | <i>After Matching</i><br><i>N=5550</i> |                                   |                                          |
|-----------------------------------|----------------------------------------|------------------------------------------|-----------------------------------|------------------------------------------|----------------------------------------|-----------------------------------|------------------------------------------|
|                                   |                                        | <i>OAC(+)</i><br><i>(N=3839)</i>         | <i>DAPT(+)</i><br><i>(N=7761)</i> | <i>Standardized</i><br><i>Difference</i> | <i>OAC(+)</i><br><i>(N=2775)</i>       | <i>DAPT(+)</i><br><i>(N=2775)</i> | <i>Standardized</i><br><i>Difference</i> |
| Tricuspid Insufficiency, n (%)    | Moderate/Severe                        | 1188 (30.9)                              | 1351 (17.4)                       | -0.320                                   | 682 (24.6)                             | 662 (23.9)                        | -0.017                                   |
| Acuity, n (%)                     | Salvage                                | 17 ( 0.4)                                | 36 ( 0.5)                         | 0.038                                    | 14 ( 0.5)                              | 15 ( 0.5)                         | 0.009                                    |
|                                   | Emergency                              | 139 ( 3.6)                               | 251 ( 3.2)                        | .                                        | 97 ( 3.5)                              | 100 ( 3.6)                        | .                                        |
|                                   | Urgent                                 | 330 ( 8.6)                               | 604 ( 7.8)                        | .                                        | 239 ( 8.6)                             | 236 ( 8.5)                        | .                                        |
|                                   | Elective                               | 3353 (87.3)                              | 6870 (88.5)                       | .                                        | 2425 (87.4)                            | 2424 (87.4)                       | .                                        |
| Heart Failure w/in 2 weeks, n (%) | Yes                                    | 3055 (79.6)                              | 5856 (75.5)                       | -0.099                                   | 2176 (78.4)                            | 2179 (78.5)                       | 0.003                                    |
| Hypertension, n (%)               | Yes                                    | 3523 (91.8)                              | 7136 (91.9)                       | 0.007                                    | 2540 (91.5)                            | 2550 (91.9)                       | 0.013                                    |
| Vascular Disease, n (%)           | Yes                                    | 2828 (73.7)                              | 6054 (78.0)                       | 0.102                                    | 2121 (76.4)                            | 2126 (76.6)                       | 0.004                                    |
| TAVR year, n (%)                  | Upto May 2017                          | 273 ( 7.1)                               | 542 ( 7.0)                        | 0.058                                    | 173 ( 6.2)                             | 171 ( 6.2)                        | 0.025                                    |
|                                   | 2016                                   | 641 (16.7)                               | 1308 (16.9)                       | .                                        | 444 (16.0)                             | 435 (15.7)                        | .                                        |
|                                   | 2015                                   | 707 (18.4)                               | 1442 (18.6)                       | .                                        | 532 (19.2)                             | 552 (19.9)                        | .                                        |
|                                   | 2014                                   | 1090 (28.4)                              | 2030 (26.2)                       | .                                        | 757 (27.3)                             | 755 (27.2)                        | .                                        |
|                                   | 2013                                   | 936 (24.4)                               | 2037 (26.2)                       | .                                        | 725 (26.1)                             | 710 (25.6)                        | .                                        |
|                                   | 2012                                   | 192 ( 5.0)                               | 402 ( 5.2)                        | .                                        | 144 ( 5.2)                             | 152 ( 5.5)                        | .                                        |
|                                   | In-hospital Atrial Fibrillation, n (%) | Yes                                      | 504 (13.1)                        | 691 ( 8.9)                               | -0.135                                 | 450 (16.2)                        | 439 (15.8)                               |
| General Anesthesia, n (%)         | Yes                                    | 3766 (98.1)                              | 7579 (97.7)                       | -0.031                                   | 2721 (98.1)                            | 2725 (98.2)                       | 0.011                                    |
| Failed Bioprosthetic Valve, n (%) | Yes                                    | 78 ( 2.0)                                | 137 ( 1.8)                        | -0.020                                   | 46 ( 1.7)                              | 48 ( 1.7)                         | 0.006                                    |

|                   | <i>Level</i>                   | <i>Before Matching</i><br><i>N=11600</i> |                                   |                                          | <i>After Matching</i><br><i>N=5550</i> |                                   |                                          |
|-------------------|--------------------------------|------------------------------------------|-----------------------------------|------------------------------------------|----------------------------------------|-----------------------------------|------------------------------------------|
|                   |                                | <i>OAC(+)</i><br><i>(N=3839)</i>         | <i>DAPT(+)</i><br><i>(N=7761)</i> | <i>Standardized</i><br><i>Difference</i> | <i>OAC(+)</i><br><i>(N=2775)</i>       | <i>DAPT(+)</i><br><i>(N=2775)</i> | <i>Standardized</i><br><i>Difference</i> |
| Valve Type, n (%) | Balloon<br>Expandable<br>Valve | 3308 (86.2)                              | 6601 (85.1)                       | -0.032                                   | 2396 (86.3)                            | 2403 (86.6)                       | 0.007                                    |

BSA = body surface area. CIED = cardiac implantable electrical device. DAPT = dual antiplatelet therapy. GFR = glomerular filtration rate. LAD = left anterior descending artery. LVEF = left ventricular ejection fraction. MI = myocardial infarction. NYHA = New York Heart Association. OAC = oral anticoagulant. PAD = peripheral arterial disease. PCI = percutaneous coronary intervention. TAVR = transcatheter aortic valve replacement. TIA = transient ischemic attack. Only patients receiving exactly one therapy (DAPT or OAC) are considered for this matching.

**eTable 13. Propensity Matched Neurologic Outcomes (Femoral Cohort)**

| Outcome                    | Level  | Propensity matched on<br>(Femoral Cohorts) |                  |                       |
|----------------------------|--------|--------------------------------------------|------------------|-----------------------|
|                            |        | DAPT<br>(N=31192)                          | OAC<br>(N=22022) | DAPT/OAC<br>(N=24668) |
| 30 day Stroke              | Censor | 30768 (98.6%)                              | 21698 (98.5%)    | 24317 (98.6%)         |
|                            | Event  | 164 (0.53%)                                | 120 (0.54%)      | 128 (0.52%)           |
|                            | Death  | 260 (0.83%)                                | 204 (0.93%)      | 223 (0.90%)           |
| 30 day TIA                 | Censor | 30853 (98.9%)                              | 21760 (98.8%)    | 24369 (98.8%)         |
|                            | Event  | 60 (0.19%)                                 | 46 (0.21%)       | 55 (0.22%)            |
|                            | Death  | 279 (0.89%)                                | 216 (0.98%)      | 244 (0.99%)           |
| 30 day Stroke/TIA          | Censor | 30711 (98.5%)                              | 21654 (98.3%)    | 24264 (98.4%)         |
|                            | Event  | 222 (0.71%)                                | 165 (0.75%)      | 181 (0.73%)           |
|                            | Death  | 259 (0.83%)                                | 203 (0.92%)      | 223 (0.90%)           |
| 30 day Ischemic Stroke     | Censor | 30788 (98.7%)                              | 21714 (98.6%)    | 24334 (98.6%)         |
|                            | Event  | 136 (0.44%)                                | 99 (0.45%)       | 102 (0.41%)           |
|                            | Death  | 268 (0.86%)                                | 209 (0.95%)      | 232 (0.94%)           |
| 30 day Hemorrhagic Stroke  | Censor | 30896 (99.1%)                              | 21792 (99.0%)    | 24413 (99.0%)         |
|                            | Event  | 24 (0.08%)                                 | 18 (0.08%)       | 19 (0.08%)            |
|                            | Death  | 272 (0.87%)                                | 212 (0.96%)      | 236 (0.96%)           |
| 30 day Undetermined Stroke | Censor | 30906 (99.1%)                              | 21800 (99.0%)    | 24417 (99.0%)         |
|                            | Event  | 6 (0.02%)                                  | 5 (0.02%)        | 8 (0.03%)             |
|                            | Death  | 280 (0.90%)                                | 217 (0.99%)      | 243 (0.99%)           |

Outcomes are 30 days from Discharge Date. DAPT = dual antiplatelet therapy. OAC = oral anticoagulant. TIA = transient ischemic attack.

**eTable 14. Propensity Matched Neurologic Outcomes (Non-Femoral Cohort)**

| Outcome                    | Level  | Propensity matched on<br>(Non-femoral Cohorts) |                 |                      |
|----------------------------|--------|------------------------------------------------|-----------------|----------------------|
|                            |        | DAPT<br>(N=6338)                               | OAC<br>(N=4608) | DAPT/OAC<br>(N=5550) |
| 30 day Stroke              | Censor | 6183 (97.6%)                                   | 4480 (97.2%)    | 5428 (97.8%)         |
|                            | Event  | 43 (0.68%)                                     | 35 (0.76%)      | 37 (0.67%)           |
|                            | Death  | 112 (1.77%)                                    | 93 (2.02%)      | 85 (1.53%)           |
| 30 day TIA                 | Censor | 6202 (97.9%)                                   | 4499 (97.6%)    | 5445 (98.1%)         |
|                            | Event  | 13 (0.21%)                                     | 7 (0.15%)       | 13 (0.23%)           |
|                            | Death  | 123 (1.94%)                                    | 102 (2.21%)     | 92 (1.66%)           |
| 30 day Stroke/TIA          | Censor | 6172 (97.4%)                                   | 4473 (97.1%)    | 5417 (97.6%)         |
|                            | Event  | 55 (0.87%)                                     | 42 (0.91%)      | 49 (0.88%)           |
|                            | Death  | 111 (1.75%)                                    | 93 (2.02%)      | 84 (1.51%)           |
| 30 day Ischemic Stroke     | Censor | 6185 (97.6%)                                   | 4483 (97.3%)    | 5431 (97.9%)         |
|                            | Event  | 35 (0.55%)                                     | 28 (0.61%)      | 32 (0.58%)           |
|                            | Death  | 118 (1.86%)                                    | 97 (2.11%)      | 87 (1.57%)           |
| 30 day Hemorrhagic Stroke  | Censor | 6212 (98.0%)                                   | 4503 (97.7%)    | 5454 (98.3%)         |
|                            | Event  | 7 (0.11%)                                      | 5 (0.11%)       | 4 (0.07%)            |
|                            | Death  | 119 (1.88%)                                    | 100 (2.17%)     | 92 (1.66%)           |
| 30 day Undetermined Stroke | Censor | 6214 (98.0%)                                   | 4506 (97.8%)    | 5456 (98.3%)         |
|                            | Event  | 1 (0.02%)                                      | 2 (0.04%)       | 2 (0.04%)            |
|                            | Death  | 123 (1.94%)                                    | 100 (2.17%)     | 92 (1.66%)           |

Outcomes are 30 days from Discharge Date. DAPT = dual antiplatelet therapy. OAC = oral anticoagulant. TIA = transient ischemic attack
